# Supplementary material for: A novel approach to the tetracyclic frameworks of anislactone-type sesquiterpenoids
Source: Royal Society of Chemistry journal article supplement (doi:10.1039/d4qo00915k), 2024-01-01
Supplement: d4qo00915k1.pdf [file d4qo00915k1.pdf]

## Supporting Information

# A Novel Approach to the Tetracyclic Frameworks of Anislactone-type Sesquiterpenoids

Long He,<sup>a</sup> Xiaocheng Zhang,<sup>a</sup> Sen Li,<sup>a</sup> Xuexue Tian,<sup>a</sup> Yimeng Han,<sup>a</sup> Haitao Xie<sup>\*b</sup> and Weiqing Xie<sup>\*a, c</sup>

<sup>a</sup>*Shaanxi Key Laboratory of Natural Products & Chemical Biology, College of Chemistry & Pharmacy, Northwest A&F University, 22 Xinong Road, Yangling, 712100, Shaanxi, China.*

<sup>b</sup>*Department of Clinical Laboratory Medicine, Institution of microbiology and infectious diseases, The First Affiliated Hospital, Heng-yang Medical School, University of South China, Hengyang, 421001, Hunan, China.*

<sup>c</sup>*Key Laboratory of Botanical Pesticide R&D in Shaanxi Province, Yangling, 712100, Shaanxi, China.*

### Table of Contents

|                                                                                    |    |
|------------------------------------------------------------------------------------|----|
| <b>1. General Information</b> .....                                                | 2  |
| <b>2. Experimental Procedures and Spectroscopic Data of Compounds</b> .....        | 2  |
| <b>3. <sup>1</sup>H and <sup>13</sup>C NMR Spectra of Selected Compounds</b> ..... | 11 |
| <b>4. X-ray Crystallographic Data</b> .....                                        | 28 |

## 1. General Information

Unless otherwise noted, reagents were obtained from commercial sources and used without further purification. Non-aqueous reaction was conducted under an inert atmosphere of argon in flame-dried glassware. Anhydrous solvent was treated as follow: tetrahydrofuran was distilled from sodium under argon atmosphere, dichloromethane and toluene was distilled from calcium hydride under argon atmosphere. The boiling range of petroleum ether was 60 to 90 °C.

Thin layer chromatography was conducted on Merck 60 F254 pre-coated silica gel plates. Column chromatography was carried out by normal silica gel (40-60  $\mu\text{m}$ , 200-400 mesh, Silicycle P60). NMR data including  $^1\text{H}$  NMR and  $^{13}\text{C}$  NMR spectra were recorded on Bruker 400 MHz, 500 MHz and 600 MHz. The chemical shifts ( $\delta$ ) for  $^1\text{H}$  and  $^{13}\text{C}$  are given in ppm relative to residual signals of the solvents. Coupling constants are given in Hz.

High-resolution mass spectra were obtained using Bruker APEXIII 7.0 TESLA FTMS (the ESI). Optical rotations were measured on an Anton Paar MCP 300 polarimeter and are reported as follows:  $[\alpha]_D^{25}$  (c g/100 mL, solvent).

The X-ray crystallographic data was collected at 173 K on a Rigaku XtaLAB PRO MM003-DS dual system with a Cu micro-focus source or Bruker D8 quest.

## 2. Experimental Procedures and Spectroscopic Data of Compounds

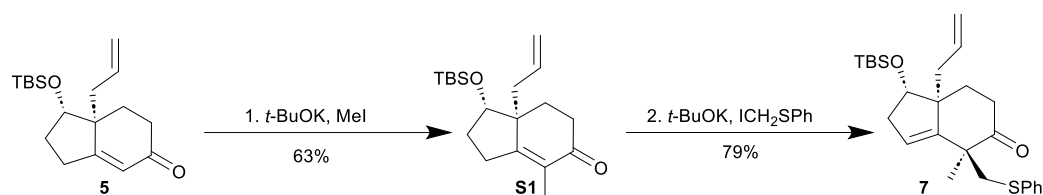

A solution of racemic enone **5** (200.0 mg, 0.6 mmol, 1.0 equiv) and *t*-BuOK (97.0 mg, 0.7 mmol, 1.2 equiv) in anhydrous *t*-BuOH (2 mL) was stirred at room temperature for 30 min under argon atmosphere. The reaction mixture was heated to 80 °C and slowly added to MeI (34.0  $\mu\text{L}$ , 0.7 mmol, 1.05 equiv.). The reaction mixture was stirred at 80 °C for 20 min before it was quenched with water (40 mL). The reaction contents were extracted with ethyl acetate (10 mL  $\times$  3). The combined organic layers were washed with brine, dried over sodium sulfate, filtered, and concentrated in vacuo. The resultant residue was purified by flash column chromatography (ethyl acetate/petroleum ether = 1/100, v/v) to yield **S1** (120 mg, 0.38 mmol, 63%) as a light yellow liquid.

**$^1\text{H}$  NMR (500 MHz,  $\text{CDCl}_3$ )**  $\delta$  6.07 – 5.91 (m, 1H), 5.05 – 4.93 (m, 2H), 3.79 (dd,  $J$  = 10.3, 7.6 Hz, 1H), 2.57 (m, 1H), 2.52 – 2.42 (m, 2H), 2.42 – 2.34 (m, 1H), 2.34 – 2.28 (m, 1H), 2.28 – 2.23 (m, 1H), 2.22 – 2.18 (m, 1H), 2.04 – 1.94 (m, 1H), 1.92 – 1.81 (m, 1H), 1.71 – 1.63 (m, 4H), 0.90 (s, 9H), 0.05 (s, 6H).

**$^{13}\text{C}$  NMR (126 MHz,  $\text{CDCl}_3$ )**  $\delta$  198.9, 166.4, 136.7, 129.6, 116.5, 82.5, 48.5, 36.6, 33.3, 33.1, 30.4, 26.3, 25.8, 18.1, 10.7, -4.5, -4.9.

**HRMS(ESI)**, Calculated  $\text{C}_{19}\text{H}_{33}\text{O}_2\text{Si}^+$ ,  $[\text{M}+\text{H}]^+$ : 321.2244, found: 321.2249.

A solution of enone **S1** (400.0 mg, 1.3 mmol, 1.0 equiv) and *t*-BuOK (210.0 mg, 2.0 mmol, 1.5 equiv) in anhydrous THF (5 mL) was stirred at 0 °C for 30 min under argon atmosphere. The reaction mixture was cooled to -78 °C and slowly added to ICH<sub>2</sub>SPh (437.0 mg, 1.8 mmol, 1.4 equiv.). The reaction mixture was stirred at -78 °C for 10 min before it was quenched with saturated ammonium

chloride solution (30 mL). The reaction contents were extracted with ethyl acetate (10 mL  $\times$  3). The combined organic layers were washed with brine, dried over sodium sulfate, filtered, and concentrated in vacuo. The resultant residue was purified by flash column chromatography (ethyl acetate/petroleum ether = 1/100, v/v) to yield compound **7** (392.0 mg, 0.9 mmol, 79%) as a light yellow liquid.

**$^1\text{H}$  NMR (500 MHz,  $\text{CDCl}_3$ )**  $\delta$  7.43 - 7.39 (m, 2H), 7.32 - 7.31 (m, 1H), 7.30 - 7.28 (m, 1H), 7.23 - 7.19 (m, 1H), 6.15 - 6.03 (m, 1H), 5.59 (dd,  $J$  = 3.5, 1.8 Hz, 1H), 5.11 - 5.01 (m, 2H), 4.11 (t,  $J$  = 8.3 Hz, 1H), 3.38 (s, 2H), 2.65 - 2.54 (m, 1H), 2.47 - 2.35 (m, 5H), 2.06 - 2.00 (m, 1H), 1.85 - 1.78 (m, 1H), 1.39 (s, 3H), 0.98 (s, 9H), 0.12 (d,  $J$  = 4.1 Hz, 6H).

**$^{13}\text{C}$  NMR (126 MHz,  $\text{CDCl}_3$ )**  $\delta$  213.4, 148.0, 137.5, 136.2, 130.1, 128.8, 126.3, 123.6, 116.6, 82.6, 52.6, 50.4, 43.9, 39.6, 37.1, 35.5, 32.2, 27.3, 27.3, 25.9, 18.1, -4.5, -4.9.

**HRMS(ESI)**, Calculated  $\text{C}_{26}\text{H}_{39}\text{O}_2\text{SSi}^+$ ,  $[\text{M}+\text{H}]^+$ : 443.2435, found: 443.2435.

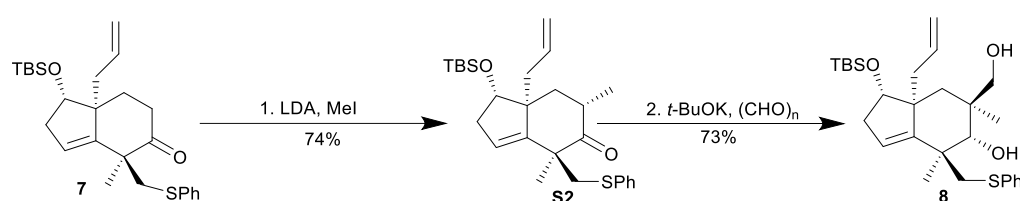

A solution of compound **7** (340.0 mg, 0.8 mmol, 1.0 equiv) in anhydrous THF (8 mL) was stirred at room temperature for 10 min under argon atmosphere. The reaction mixture was cooled to  $-78\text{ }^\circ\text{C}$  and slowly added to lithium diisopropylamide (LDA) (1.6 mL, 1.6 mmol, 2.0 equiv, 1 M in THF). The reaction mixture was stirred at  $-78\text{ }^\circ\text{C}$  for 10 min and warmed to room temperature for 50 min and slowly added to MeI (239.0  $\mu\text{L}$ , 4.0 mmol, 5.0 equiv). The reaction mixture was stirred at room temperature for 4 h before it was quenched with saturated ammonium chloride solution (30 mL). The reaction contents were extracted with ethyl acetate (10 mL  $\times$  3). The combined organic layers were washed with brine, dried over sodium sulfate, filtered, and concentrated in vacuo. The resultant residue was purified by flash column chromatography (ethyl acetate/petroleum ether = 1/100, v/v) to yield compound **S2** (259.0 mg, 0.6 mmol, 74%) as a yellow liquid.

**$^1\text{H}$  NMR (500 MHz,  $\text{CDCl}_3$ )**  $\delta$  7.43 - 7.38 (m, 2H), 7.30 - 7.27 (m, 2H), 7.21-7.16 (m, 1H), 6.15 - 6.05 (m, 1H), 5.50 (dd,  $J$  = 3.5, 1.8 Hz, 1H), 5.11-4.96 (m, 2H), 4.05 (t,  $J$  = 8.4 Hz, 1H), 3.44 (d,  $J$  = 12.1 Hz, 1H), 3.34 (d,  $J$  = 12.1 Hz, 1H), 2.76 - 2.66 (m, 1H), 2.60 (d,  $J$  = 18.9 Hz, 1H), 2.47 (dd,  $J$  = 14.3, 8.2 Hz, 1H), 2.40 - 2.28 (m, 2H), 2.08 (dd,  $J$  = 13.0, 5.3 Hz, 1H), 1.46 (t,  $J$  = 13.3 Hz, 1H), 1.39 (s, 3H), 1.13 (d,  $J$  = 6.6 Hz, 3H), 0.95 (s, 9H), 0.10 (d,  $J$  = 7.3 Hz, 6H).

**$^{13}\text{C}$  NMR (126 MHz,  $\text{CDCl}_3$ )**  $\delta$  214.5, 148.4, 137.8, 136.4, 130.1, 128.8, 126.2, 123.2, 116.5, 83.3, 53.3, 50.4, 43.5, 42.4, 39.6, 37.4, 37.0, 29.2, 25.9, 18.1, 15.7, -4.5, -4.8.

**HRMS(ESI)**, Calculated  $\text{C}_{27}\text{H}_{41}\text{O}_2\text{SSi}^+$ ,  $[\text{M}+\text{H}]^+$ : 457.2591, found: 457.2590.

A solution of compound **S2** (456.0 mg, 1.0 mmol, 1.0 equiv) and *t*-BuOK (224.0 mg, 2.0 mmol, 2.0 equiv) in anhydrous THF (5 mL) was stirred at room temperature for 30 min under argon atmosphere. The reaction mixture was added to paraformaldehyde (300.0 mg, 10.0 mmol, 10.0 equiv) and stirred at room temperature for 4 h. The reaction mixture was quenched with water (30 mL). The reaction contents were extracted with ethyl acetate (10 mL  $\times$  3). The combined organic layers were washed with brine, dried over sodium sulfate, filtered, and concentrated in vacuo. The resultant residue was purified by flash column chromatography (ethyl acetate/petroleum ether = 1/10, v/v) to yield compound **8** (356.2 mg, 0.73 mmol, 73%) as a yellow liquid.

**<sup>1</sup>H NMR (500 MHz, CDCl<sub>3</sub>)** δ 7.45 - 7.40 (m, 2H), 7.27-7.25 (m, 2H), 7.16-7.14 (m, 1H), 6.04 - 5.93 (m, 1H), 5.55 (dd, *J* = 3.6, 1.6 Hz, 1H), 5.03 (d, *J* = 15.3 Hz, 1H), 4.94 (d, *J* = 10.0 Hz, 1H), 3.95 (d, *J* = 3.6 Hz, 1H), 3.92 (t, *J* = 8.4 Hz, 1H), 3.33-3.30 (m, 2H), 3.28 (s, 2H), 3.04 (d, *J* = 3.8 Hz, 1H), 2.65 (m, 2H), 2.53 (m, 1H), 2.32 (m, 1H), 2.22 (m, 1H), 1.62 (d, *J* = 13.9 Hz, 1H), 1.30 (s, 3H), 1.26 (s, 3H), 1.03 (d, *J* = 14.0 Hz, 1H), 0.92 (s, 9H), 0.05 (d, *J* = 5.9 Hz, 6H)

**<sup>13</sup>C NMR (126 MHz, CDCl<sub>3</sub>)** δ 147.6, 138.1, 137.0, 129.5, 129.0, 126.0, 123.3, 116.2, 86.5, 77.7, 76.7, 50.7, 44.9, 44.7, 44.0, 39.4, 39.4, 39.3, 25.9, 22.3, 18.1, 18.0, -4.4, -4.8

**HRMS(ESI)**, Calculated C<sub>28</sub>H<sub>45</sub>O<sub>3</sub>SSi<sup>+</sup>, [M+H]<sup>+</sup>: 489.2853, found: 489.2587.

m.p.: 106.48-107.58 °C;

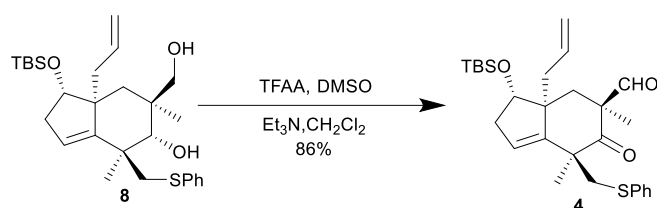

A solution of trifluoroacetic anhydride (TFAA) (340.0 mg, 1.5 mmol, 2.2 equiv) in anhydrous CH<sub>2</sub>Cl<sub>2</sub> (5 mL) was stirred at -78 °C for 10 min under argon atmosphere. The reaction mixture was slowly added to DMSO (385.0 μL, 5.5 mmol, 8.0 equiv) and stirred at -78 °C for 30 min. The reaction mixture was added to compound **8** (330.0 mg, 0.7 mmol, 1.0 equiv). The reaction mixture was stirred at -78 °C for 60 min before it was added to Et<sub>3</sub>N (1.38 mL, 10.0 mmol, 15.0 equiv). The reaction mixture was stirred at room temperature for 60 min before it was quenched with saturated ammonium chloride solution (30 mL). The reaction contents were extracted with ethyl acetate (10 mL × 3). The combined organic layers were washed with brine, dried over sodium sulfate, filtered, and concentrated in vacuo. The resultant residue was purified by flash column chromatography (ethyl acetate/petroleum ether = 1/80, v/v) to yield compound **4** (300.0 mg, 0.6 mmol, 86%).

**<sup>1</sup>H NMR (500 MHz, CDCl<sub>3</sub>)** δ 9.42 (s, 1H), 7.37 - 7.31 (m, 3H), 7.30 (d, *J* = 1.7 Hz, 1H), 7.25 - 7.20 (m, 1H), 6.08 - 5.97 (m, 1H), 5.70 (dd, *J* = 3.4, 1.8 Hz, 1H), 5.05 - 4.99 (m, 2H), 4.28 (t, *J* = 8.3 Hz, 1H), 3.36 (d, *J* = 12.2 Hz, 1H), 3.24 (d, *J* = 12.2 Hz, 1H), 2.65 (d, *J* = 14.8 Hz, 1H), 2.55 - 2.48 (m, 1H), 2.43 - 2.36 (m, 1H), 2.35 - 2.27 (m, 1H), 2.22 - 2.15 (m, 1H), 1.75 (d, *J* = 14.8 Hz, 1H), 1.45 (s, 3H), 1.40 (s, 3H), 0.98 (s, 9H), 0.15 (d, *J* = 20.6 Hz, 6H).

**<sup>13</sup>C NMR (126 MHz, CDCl<sub>3</sub>)** δ 211.3, 198.4, 146.4, 136.7, 135.7, 129.7, 129.0, 126.5, 124.9, 116.9, 82.1, 61.2, 52.2, 50.3, 43.7, 40.4, 39.6, 39.6, 25.9, 25.0, 23.0, 18.0, -4.4, -4.8

**HRMS(ESI)**, Calculated C<sub>28</sub>H<sub>41</sub>O<sub>3</sub>SSi<sup>+</sup>, [M+H]<sup>+</sup>: 485.2540, found: 485.2543.

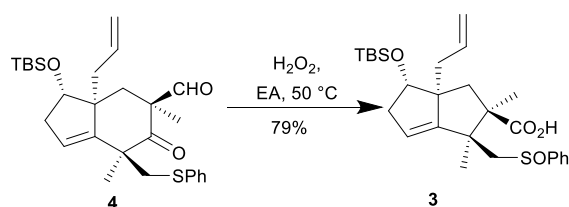

A solution of compound **4** (500.0 mg, 1.0 mmol, 1.0 equiv) in ethyl acetate (5 mL) was stirred at room temperature for 10 min. The reaction mixture was added to H<sub>2</sub>O<sub>2</sub> (30% in H<sub>2</sub>O) (1.3 mL, 10.0 mmol, 10.0 equiv) and stirred at 50 °C for 12 h. The reaction mixture was quenched with water (30

mL). The reaction contents were extracted with ethyl acetate (10 mL × 3). The combined organic layers were washed with brine, dried over sodium sulfate, filtered, and concentrated in vacuo. The resultant residue was purified by flash column chromatography (ethyl acetate/petroleum ether = 1/8, v/v) to yield compound **3** (386.2 mg, 0.79 mmol, 79%) as a white solid.

**<sup>1</sup>H NMR (500 MHz, CDCl<sub>3</sub>)** δ 7.66-7.63 (m, 2H), 7.45 - 7.38 (m, 3H), 6.09 - 5.96 (m, 1H), 5.33 (m, 1H), 5.04 - 4.91 (m, 2H), 4.49 (t, *J* = 8.1 Hz, 1H), 3.12 (d, *J* = 14.1 Hz, 1H), 2.98 (d, *J* = 14.0 Hz, 1H), 2.50 (m, 1H), 2.46 - 2.38 (m, 2H), 2.33 (d, *J* = 14.5 Hz, 1H), 2.23 (m, 1H), 1.55 (d, *J* = 14.2 Hz, 1H), 1.49 (s, 3H), 1.45 (s, 3H), 0.88 (s, 9H), 0.01 (d, *J* = 9.3 Hz, 6H).

**<sup>13</sup>C NMR (126 MHz, CDCl<sub>3</sub>)** δ 180.7, 157.1, 145.0, 137.1, 131.1, 129.3, 124.3, 119.3, 116.2, 82.3, 68.0, 58.8, 56.4, 47.2, 44.7, 41.3, 40.3, 25.9, 21.8, 21.7, 18.1, -4.5, -4.6.

**HRMS(ESI)**, Calculated C<sub>28</sub>H<sub>41</sub>O<sub>4</sub>SSi<sup>+</sup>, [M+H]<sup>+</sup>: 489.2489, found: 489.2491.

m.p.: 73.77-74.60 °C;

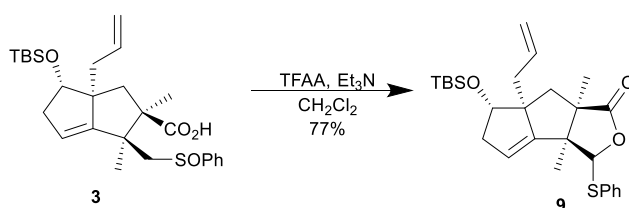

A solution of compound **3** (120.0 mg, 0.2 mmol, 1.0 equiv) in CH<sub>2</sub>Cl<sub>2</sub> (8 mL) was stirred at room temperature for 10 min. The reaction mixture was added to Et<sub>3</sub>N (96.0 μL, 0.6 mmol, 2.5 equiv) and stirred at room temperature for 10 min. The reaction mixture was added to trifluoroacetic anhydride (42.0 μL, 0.3 mmol, 1.2 equiv) and stirred at room temperature for 20 min. The reaction mixture was quenched with water (30 mL). The reaction contents were extracted with ethyl acetate (10 mL × 3). The combined organic layers were washed with brine, dried over sodium sulfate, filtered, and concentrated in vacuo. The resultant residue was purified by flash column chromatography (ethyl acetate/petroleum ether = 1/20, v/v) to yield compound **9** (95.2 mg, 0.15 mmol, 77%) as a white solid.

**<sup>1</sup>H NMR (500 MHz, CDCl<sub>3</sub>)** δ 7.61 (d, *J* = 7.0 Hz, 2H), 7.39 (d, *J* = 7.1 Hz, 2H), 7.31 (s, 1H), 6.14 (s, 1H), 6.11 - 6.00 (m, 1H), 5.39 (s, 1H), 5.05 (t, *J* = 14.5 Hz, 2H), 4.12 - 3.97 (m, 1H), 2.56 - 2.46 (m, 2H), 2.41 - 2.31 (m, 2H), 1.71 - 1.59 (m, 2H), 1.43 (s, 3H), 1.21 (s, 3H), 0.95 (s, 9H), 0.10 (d, *J* = 10.0 Hz, 6H).

**<sup>13</sup>C NMR (126 MHz, CDCl<sub>3</sub>)** δ 181.0, 151.1, 136.5, 135.0, 131.9, 129.4, 128.2, 123.6, 116.6, 95.1, 83.6, 58.3, 58.0, 53.7, 44.6, 42.3, 40.8, 25.9, 18.0, 17.5, 17.1, -4.6, -4.8.

**HRMS(ESI)**, Calculated C<sub>27</sub>H<sub>39</sub>O<sub>3</sub>SSi<sup>+</sup>, [M+H]<sup>+</sup>: 471.2384, found: 471.2384.

m.p.: 123.72-125.38 °C;

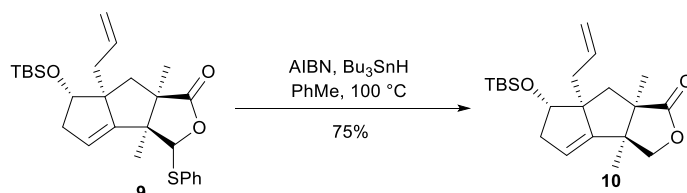

A solution of compound **9** (150.0 mg, 0.3 mmol, 1.0 equiv) and Bu<sub>3</sub>SnH (931.0 mg, 3.2 mmol, 10.0 equiv) in PhMe (15 mL) was stirred at room temperature for 10 min. The reaction mixture was

added to AIBN (524.0 mg, 3.2 mmol, 10.0 equiv, added to the bottle in 4 batches at intervals of 1 h) and stirred at 100 °C for 5 h. The reaction mixture was quenched with water (30 mL). The reaction contents were extracted with ethyl acetate (10 mL × 3). The combined organic layers were washed with brine, dried over sodium sulfate, filtered, and concentrated in vacuo. The resultant residue was purified by flash column chromatography (ethyl acetate/petroleum ether = 1/80, v/v) to yield compound **10** (87.0 mg, 0.24 mmol, 75%) as a white solid.

**<sup>1</sup>H NMR (500 MHz, CDCl<sub>3</sub>)** δ 6.08 - 5.93 (m, 1H), 5.50 (dd, *J* = 4.0, 1.7 Hz, 1H), 5.04 - 4.91 (m, 2H), 4.37 (d, *J* = 9.1 Hz, 1H), 4.02 - 3.94 (m, 1H), 3.89 (d, *J* = 9.1 Hz, 1H), 2.50 (dd, *J* = 13.9, 7.6 Hz, 1H), 2.44 (dd, *J* = 16.8, 8.8 Hz, 1H), 2.38 - 2.31 (m, 1H), 2.28 - 2.21 (m, 1H), 2.18 (d, *J* = 14.2 Hz, 1H), 1.58 (d, *J* = 14.3 Hz, 1H), 1.19 (s, 3H), 1.18 (s, 3H), 0.89 (s, 9H), 0.05 (s, 3H), 0.02 (s, 3H).

**<sup>13</sup>C NMR (126 MHz, CDCl<sub>3</sub>)** δ 183.4, 154.7, 136.5, 119.8, 116.4, 84.1, 73.6, 58.2, 55.4, 48.2, 45.7, 41.9, 40.9, 25.8, 18.2, 18.0, 17.5, -4.7, -4.8.

**HRMS(ESI)**, Calculated C<sub>21</sub>H<sub>38</sub>NO<sub>3</sub>Si<sup>+</sup>, [M+NH<sub>4</sub>]<sup>+</sup>: 380.2615, found: 380.2612.

m.p.:133.74-135.56 °C;

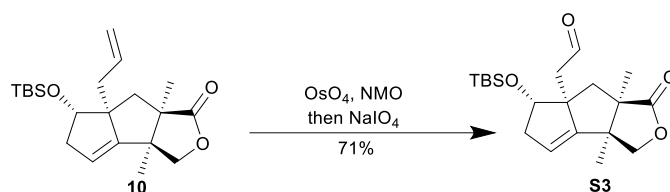

A solution of compound **10** (500.0 mg, 1.4 mmol, 1.0 equiv) in acetone (14 mL) was stirred at room temperature for 10 min. The reaction mixture was added to OsO<sub>4</sub> (0.7 mL, 0.055 mmol, 0.04 equiv, 2% in H<sub>2</sub>O) and stirred at room temperature for 50 min. The reaction mixture was added to water (14 mL) and NaIO<sub>4</sub> (882.0 mg, 4.1 mmol, 3.0 equiv). Then, the reaction mixture was stirred at room temperature for 50 min. The reaction mixture was quenched with saturated NaS<sub>2</sub>O<sub>3</sub> (30 mL). The reaction contents were extracted with ethyl acetate (10 mL × 3). The combined organic layers were washed with brine, dried over sodium sulfate, filtered, and concentrated in vacuo. The resultant residue was purified by flash column chromatography (ethyl acetate/petroleum ether = 1/8, v/v) to yield compound **S3** (360.0 mg, 1.0 mmol, 71%) as a white solid.

**<sup>1</sup>H NMR (500 MHz, CDCl<sub>3</sub>)** δ 9.81 (dd, *J* = 3.7, 1.5 Hz, 1H), 5.51 - 5.52 (m, 1H), 4.36 (d, *J* = 9.3 Hz, 1H), 4.03 (dd, *J* = 8.7, 7.1 Hz, 1H), 3.92 (d, *J* = 9.3 Hz, 1H), 2.70 (dd, *J* = 15.1, 3.7 Hz, 1H), 2.52 - 2.37 (m, 3H), 2.34 (dd, *J* = 15.1, 1.6 Hz, 1H), 1.85 (d, *J* = 9.3 Hz, 1H), 1.19 (d, *J* = 20.6 Hz, 6H), 0.86 (s, 9H), 0.04 (d, *J* = 8.3 Hz, 6H).

**<sup>13</sup>C NMR (126 MHz, CDCl<sub>3</sub>)** δ 202.0, 182.6, 154.7, 120.2, 83.6, 73.1, 57.4, 56.2, 48.2, 47.8, 44.0, 41.2, 25.8, 18.0, 17.9, 17.0, -4.7, -4.9.

**HRMS(ESI)**, Calculated C<sub>20</sub>H<sub>33</sub>O<sub>4</sub>Si<sup>+</sup>, [M+H]<sup>+</sup>: 365.2143, found: 365.2135.

m.p.:122.85-123.73 °C;

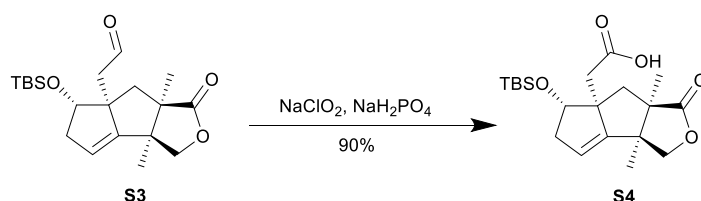

A solution of compound **S3** (2.0 g, 5.6 mmol, 1.0 equiv) in acetone (112 mL) and water (28 mL) was stirred at room temperature for 10 min. The reaction mixture was added to 2-methyl-2-butene (10.8 mL, 140.0 mmol, 25.0 equiv) and stirred at room temperature for 5 min. The reaction mixture was added to NaClO<sub>2</sub> (5.1 g, 56.0 mmol, 10.0 equiv) and NaH<sub>2</sub>PO<sub>4</sub> (4.7 g, 38.2 mmol, 6.8 equiv). The reaction mixture was stirred at room temperature for 50 min. The reaction mixture was quenched with water (30 mL). The reaction contents were concentrated in vacuo to remove acetone and extracted with ethyl acetate (10 mL × 3). The combined organic layers were washed with brine, dried over sodium sulfate, filtered, and concentrated in vacuo. The resultant residue was purified by flash column chromatography (ethyl acetate/petroleum ether = 1/4, v/v) to yield compound **S4** (1.9 g, 5.1 mmol, 90%) as a white solid.

**<sup>1</sup>H NMR (500 MHz, CDCl<sub>3</sub>)** δ 5.52 - 5.51 (m, 1H), 4.35 (d, *J* = 9.3 Hz, 1H), 4.05 (dd, *J* = 8.7, 7.0 Hz, 1H), 3.91 (d, *J* = 9.3 Hz, 1H), 2.84 (d, *J* = 15.0 Hz, 1H), 2.60 - 2.53 (m, 1H), 2.51 - 2.37 (m, 3H), 1.94 (d, *J* = 15.2 Hz, 1H), 1.19 (d, *J* = 3.3 Hz, 6H), 0.89 (s, 9H), 0.10 (d, *J* = 4.8 Hz, 6H).

**<sup>13</sup>C NMR (126 MHz, CDCl<sub>3</sub>)** δ 182.6, 174.4, 154.9, 120.5, 84.0, 73.2, 55.9, 55.8, 48.3, 42.7, 40.5, 38.9, 25.8, 18.1, 17.7, 16.8, -4.8, -4.9.

**HRMS(ESI)**, Calculated C<sub>20</sub>H<sub>33</sub>O<sub>5</sub>Si<sup>+</sup>, [M+H]<sup>+</sup>: 381.2092, found: 381.2094.

m.p.: 139.24-140.72 °C;

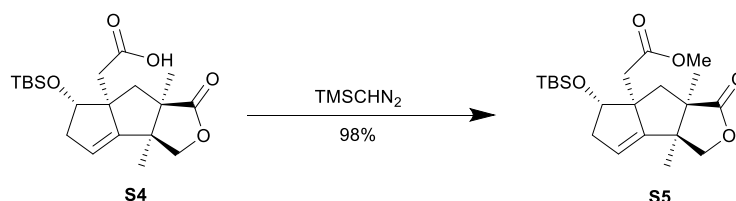

A solution of compound **S4** (950.0 mg, 2.5 mmol, 1.0 equiv) in CH<sub>2</sub>Cl<sub>2</sub> (50 mL) and MeOH (10 mL) was stirred at room temperature for 10 min. The reaction mixture was added to TMSCHN<sub>2</sub> (2.5 mL, 5.0 mmol, 2.0 equiv, 2 M in CH<sub>2</sub>Cl<sub>2</sub>) and stirred at 30 °C for 30 min. The reaction mixture was quenched with water (30 mL). The reaction contents were extracted with ethyl acetate (10 mL × 3). The combined organic layers were washed with brine, dried over sodium sulfate, filtered, and concentrated in vacuo. The resultant residue was purified by flash column chromatography (ethyl acetate/petroleum ether = 1/10, v/v) to yield compound **S5** (975 mg, 2.47 mmol, 98%) as a white solid.

**<sup>1</sup>H NMR (500 MHz, CDCl<sub>3</sub>)** δ 5.52 (dd, *J* = 4.1, 1.8 Hz, 1H), 4.34 (d, *J* = 9.2 Hz, 1H), 3.95 (dd, *J* = 8.7, 7.1 Hz, 1H), 3.89 (d, *J* = 9.2 Hz, 1H), 3.62 (s, 3H), 2.61 (d, *J* = 15.3 Hz, 1H), 2.48 - 2.34 (m, 4H), 2.19 (d, *J* = 15.0 Hz, 1H), 1.18 (s, 3H), 1.12 (s, 3H), 0.85 (s, 9H), 0.02 (d, *J* = 1.9 Hz, 6H).

**<sup>13</sup>C NMR (126 MHz, CDCl<sub>3</sub>)** δ 182.9, 172.3, 155.1, 120.8, 83.9, 73.2, 56.4, 55.7, 51.1, 48.3, 42.8, 40.8, 37.1, 25.8, 18.2, 17.8, 16.7, -4.8, -4.9.

**HRMS(ESI)**, Calculated C<sub>21</sub>H<sub>35</sub>O<sub>5</sub>Si<sup>+</sup>, [M+H]<sup>+</sup>: 395.2248, found: 395.2251.

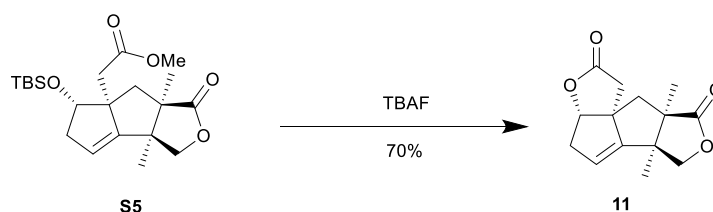

A solution of compound **S5** (975.0 mg, 2.5 mmol, 1.0 equiv) in THF (25 mL) was stirred at room temperature for 10 min. The reaction mixture was added to TBAF (7.4 mL, 7.4 mmol, 3.0 equiv, 1 M in THF) and stirred at room temperature for 40 min. The reaction mixture was quenched with water (30 mL). The reaction contents were extracted with ethyl acetate (10 mL  $\times$  3). The combined organic layers were washed with brine, dried over sodium sulfate, filtered, and concentrated in vacuo. The resultant residue was purified by flash column chromatography (ethyl acetate/petroleum ether = 1/8, v/v) to yield compound **11** (428.0 mg, 1.73 mmol, 70%) as a white solid.

**<sup>1</sup>H NMR (500 MHz, CDCl<sub>3</sub>)**  $\delta$  5.47 (dd,  $J$  = 3.5, 1.7 Hz, 1H), 4.92 (dd,  $J$  = 8.3, 6.1 Hz, 1H), 4.41 (d,  $J$  = 9.5 Hz, 1H), 3.99 (d,  $J$  = 9.4 Hz, 1H), 2.99 -2.98 (m, 1H), 2.89 (d,  $J$  = 18.1 Hz, 1H), 2.65 - 2.64 (m, 1H), 2.59 (d,  $J$  = 14.6 Hz, 1H), 2.56 (d,  $J$  = 11.1 Hz, 1H), 1.78 (d,  $J$  = 14.6 Hz, 1H), 1.22 (s, 3H), 1.15 (s, 3H).

**<sup>13</sup>C NMR (126 MHz, CDCl<sub>3</sub>)**  $\delta$  182.1, 176.4, 153.8, 119.8, 91.1, 72.5, 58.2, 55.5, 48.2, 47.4, 43.4, 42.0, 18.1, 16.1.

**HRMS(ESI)**, Calculated C<sub>14</sub>H<sub>16</sub>O<sub>4</sub>Na<sup>+</sup>, [M+Na]<sup>+</sup>: 271.0941, found: 271.0939.

m.p.:171.30-172.81 °C;

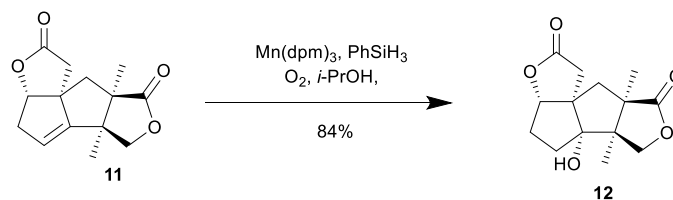

A solution of compound **11** (100.0 mg, 0.4 mmol, 1.0 equiv) in *i*-PrOH (8 mL) and CH<sub>2</sub>Cl<sub>2</sub> (2 mL) was stirred at room temperature under O<sub>2</sub> for 10 min. The reaction mixture was added to Mn(dpm)<sub>3</sub> (41.0 mg, 0.16 mmol, 0.4 equiv) and stirred at room temperature for 3 min. The reaction mixture was added to PhSiH<sub>3</sub> (96.0  $\mu$ L, 0.8 mmol, 2.0 equiv) and stirred at room temperature for 1 h. The reaction mixture was quenched with water (30 mL). The reaction contents were extracted with ethyl acetate (10 mL  $\times$  3). The combined organic layers were washed with brine, dried over sodium sulfate, filtered, and concentrated in vacuo. The resultant residue was purified by flash column chromatography (ethyl acetate/petroleum ether = 1/8, v/v) to yield compound **12** (89.0 mg, 0.34 mmol, 84%) as a white solid.

**<sup>1</sup>H NMR (500 MHz, Methanol-d<sub>4</sub>)**  $\delta$  4.67 (dd,  $J$  = 6.4, 3.9 Hz, 1H), 4.34 (d,  $J$  = 9.8 Hz, 1H), 3.89 (d,  $J$  = 9.9 Hz, 1H), 3.27 (s, 1H), 3.13 (d,  $J$  = 17.8 Hz, 1H), 2.49 (d,  $J$  = 17.8 Hz, 1H), 2.24 (d,  $J$  = 14.9 Hz, 1H), 2.18 -2.17 (m, 1H), 2.08 - 1.99 (m, 1H), 1.90 - 1.75 (m, 3H), 1.16 (s, 3H), 1.06 (s, 3H).

**<sup>13</sup>C NMR (126 MHz, Methanol-d<sub>4</sub>)**  $\delta$  183.7, 178.1, 81.0, 80.2, 58.4, 54.7, 50.8, 44.4, 38.4, 35.3, 30.5, 18.5, 15.2.

**HRMS(ESI)**, Calculated C<sub>14</sub>H<sub>19</sub>O<sub>5</sub><sup>+</sup>, [M+H]<sup>+</sup>: 267.1227, found: 267.1226.

m.p.:201.48-203.74 °C;

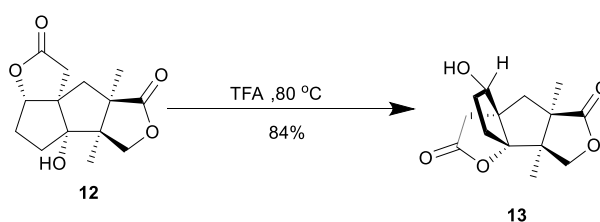



A solution of compound **12** (152.0 mg, 0.6 mmol, 1.0 equiv) in CF<sub>3</sub>COOH (6 mL) was stirred at 80 °C for 18 h. The reaction mixture was quenched with saturated NaHCO<sub>3</sub> aqueous solution (80 mL). The reaction contents were extracted with ethyl acetate (10 mL × 5). The combined organic layers were washed with brine, dried over sodium sulfate, filtered, and concentrated in vacuo. The resultant residue was purified by flash column chromatography (ethyl acetate/petroleum ether = 1/8, v/v) to yield compound **13** (138.0 mg, 0.52 mmol, 84%) as a white solid.

**<sup>1</sup>H NMR (500 MHz, CDCl<sub>3</sub>)** δ 4.33 (d, *J* = 10.0 Hz, 1H), 3.99 (d, *J* = 10.0 Hz, 1H), 3.97-3.93 (m, 1H), 3.34 (d, *J* = 19.6 Hz, 1H), 2.55 (d, *J* = 14.4 Hz, 1H), 2.31 (d, *J* = 19.6 Hz, 1H), 1.98 (q, *J* = 5.5, 4.2 Hz, 2H), 1.75 - 1.56 (m, 3H), 1.21 (s, 3H), 1.07 (s, 3H).

**<sup>13</sup>C NMR (101 MHz, CDCl<sub>3</sub>)** δ 181.2, 176.7, 105.0, 79.1, 72.8, 58.6, 55.3, 54.5, 46.0, 37.9, 32.5, 30.8, 18.8, 15.2.

**HRMS(ESI)**, Calculated C<sub>14</sub>H<sub>19</sub>O<sub>5</sub><sup>+</sup>, [M+H]<sup>+</sup>: 267.1227, found: 267.1231.

m.p.: 177.81-179.34 °C;

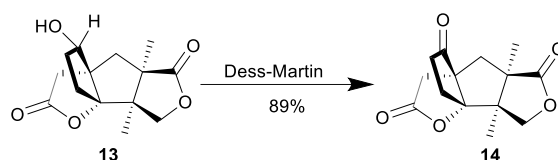

A solution of compound **13** (67.0 mg, 250.0 μmol, 1.0 equiv) in CH<sub>2</sub>Cl<sub>2</sub> (3 mL) was stirred at room temperature for 10 min. The reaction mixture was added to NaHCO<sub>3</sub> (28.0 mg, 0.3 mmol, 1.3 equiv) and DMP (128.0 mg, 0.3 mmol, 1.2 equiv) stirred at room temperature for 20 min. The reaction mixture was quenched with water (30 mL). The reaction contents were extracted with CH<sub>2</sub>Cl<sub>2</sub> (10 mL × 3). The combined organic layers were washed with brine, dried over sodium sulfate, filtered, and concentrated in vacuo. The resultant residue was purified by flash column chromatography (ethyl acetate/petroleum ether = 1/10, v/v) to yield compound **14** (60.0 mg, 0.22 mmol, 89%) as a white solid.

**<sup>1</sup>H NMR (500 MHz, CDCl<sub>3</sub>)** δ 4.15 (d, *J* = 9.9 Hz, 1H), 3.99 (d, *J* = 10.0 Hz, 1H), 2.92 (d, *J* = 19.1 Hz, 1H), 2.83-2.70 (m, 3H), 2.58-2.52 (m, 1H), 2.39 - 2.27 (m, 1H), 2.21 - 2.09 (m, 1H), 1.87 (d, *J* = 15.1 Hz, 1H), 1.25 (s, 3H), 1.20 (s, 3H).

**<sup>13</sup>C NMR (126 MHz, CDCl<sub>3</sub>)** δ 213.9, 179.5, 173.5, 101.7, 71.6, 60.8, 56.3, 54.6, 42.6, 41.6, 37.3, 28.3, 18.9, 15.4.

**HRMS(ESI)**, Calculated C<sub>14</sub>H<sub>16</sub>O<sub>5</sub>Na<sup>+</sup>, [M+H]<sup>+</sup>: 287.0890, found: 287.0884.

m.p.: 196.77-199.85 °C;

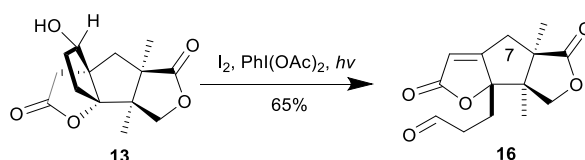

A solution of compound **13** (27.0 mg, 0.1 mmol, 1.0 equiv) in CH<sub>2</sub>Cl<sub>2</sub> (3 mL) was stirred at room temperature for 10 min. The reaction mixture was added to PhI(OAc)<sub>2</sub> (97.0 mg, 0.3 mmol, 3.0 equiv) and I<sub>2</sub> (26.0 mg, 0.1 mmol, 1.0 equiv) stirred at room temperature under blue light for 20 min. The reaction mixture was quenched with saturated Na<sub>2</sub>S<sub>2</sub>O<sub>3</sub> aqueous solution water (30 mL).

The reaction contents were extracted with CH<sub>2</sub>Cl<sub>2</sub> (10 mL × 3). The combined organic layers were washed with brine, dried over sodium sulfate, filtered, and concentrated in vacuo. The resultant residue was purified by flash column chromatography (ethyl acetate/petroleum ether = 1/8, v/v) to yield compound **16** (17.0 mg, 65.0 μmol, 65%) as a white solid.

**<sup>1</sup>H NMR (500 MHz, CDCl<sub>3</sub>)** δ 9.67 (s, 1H), 5.84 (d, *J* = 2.3 Hz, 1H), 4.62 (d, *J* = 10.8 Hz, 1H), 4.05 (d, *J* = 10.8 Hz, 1H), 3.23 (dd, *J* = 17.6, 2.4 Hz, 1H), 2.51 (d, *J* = 17.6 Hz, 1H), 2.47 - 2.26 (m, 3H), 2.01 - 1.99 (m, 1H), 1.30 (s, 3H), 0.91 (s, 3H).

**<sup>13</sup>C NMR (126 MHz, CDCl<sub>3</sub>)** δ 199.3, 181.2, 174.4, 172.8, 114.5, 93.3, 70.4, 53.0, 51.2, 36.8, 33.5, 22.9, 20.2, 13.5.

**HRMS(ESI)**, Calculated C<sub>14</sub>H<sub>17</sub>O<sub>5</sub><sup>+</sup>, [M+H]<sup>+</sup>: 265.1071, found: 265.1091.

m.p.: 174.48-175.12 °C;

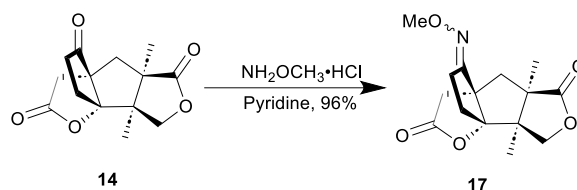

A solution of compound **14** (13.0 mg, 0.05 mmol, 1.0 equiv) in pyridine (1 mL) was stirred at 80 °C for 5 min. The reaction mixture was added to NH<sub>2</sub>OCH<sub>3</sub>·HCl (9.0 mg, 0.1 mmol, 2.0 equiv) and stirred at 80 °C for 2 h. The reaction mixture was quenched with HCl (30 mL, 2 M in water). The reaction contents were extracted with ethyl acetate (10 mL × 3). The combined organic layers were washed with brine, dried over sodium sulfate, filtered, and concentrated in vacuo. The resultant residue was purified by flash column chromatography (ethyl acetate/petroleum ether = 1/6, v/v) to yield compound **17** (14.0 mg, 48.0 μmol, 96%) as a white solid.

**<sup>1</sup>H NMR (500 MHz, CDCl<sub>3</sub>)** δ 4.24 (d, *J* = 9.8 Hz, 1H), 3.95 (d, *J* = 9.8 Hz, 1H), 3.84 (s, 3H), 2.99 (d, *J* = 19.4 Hz, 1H), 2.84 (d, *J* = 19.4 Hz, 1H), 2.81 - 2.61 (m, 3H), 2.22 - 2.13 (m, 2H), 2.08 (m, 1H), 1.23 (s, 3H), 1.18 (s, 3H).

**<sup>13</sup>C NMR (126 MHz, CDCl<sub>3</sub>)** δ 180.2, 174.8, 164.5, 104.9, 72.0, 62.2, 57.7, 55.3, 54.2, 45.3, 43.0, 30.8, 30.1, 18.8, 15.9.

**HRMS(ESI)**, Calculated C<sub>15</sub>H<sub>20</sub>O<sub>5</sub><sup>+</sup>, [M+H]<sup>+</sup>: 294.1336, found: 294.1337.

m.p.: 205.47-207.46 °C;

### 3. <sup>1</sup>H and <sup>13</sup>C NMR Spectra of Selected Compounds

#### Compounds S1

#### <sup>1</sup>H NMR (500 MHz, CDCl<sub>3</sub>)

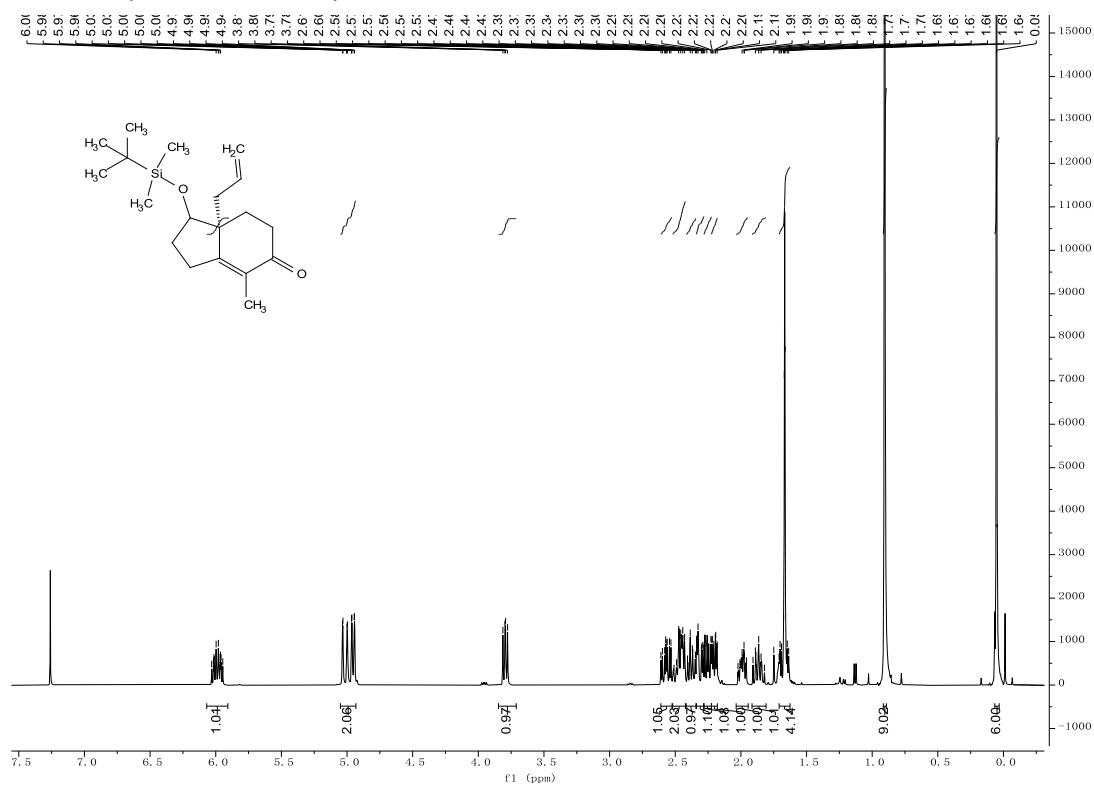

#### <sup>13</sup>C NMR (126 MHz, CDCl<sub>3</sub>)

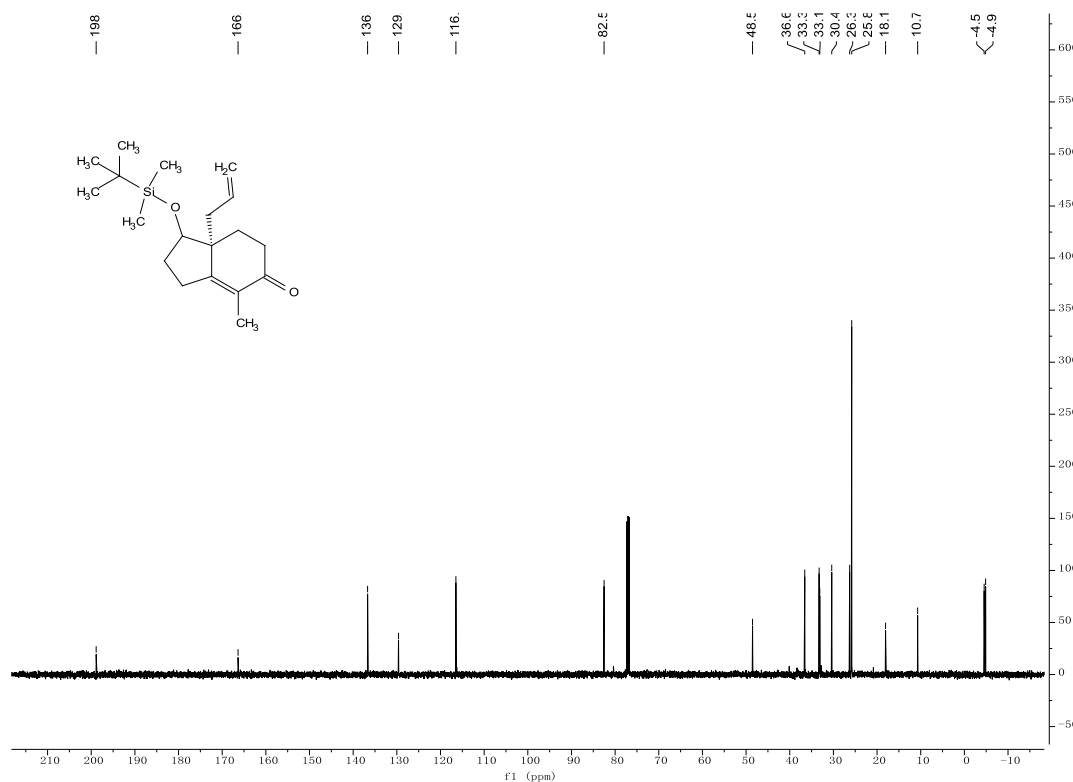

Compounds 7

<sup>1</sup>H NMR (500 MHz, CDCl<sub>3</sub>)

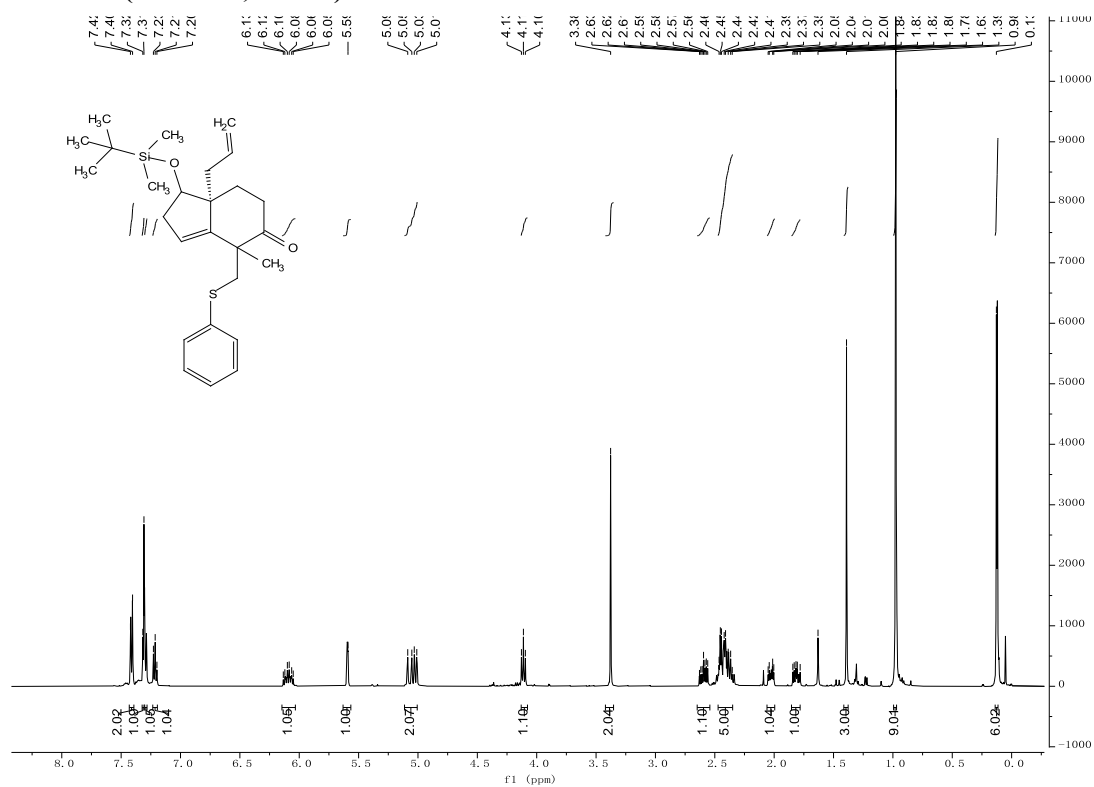

<sup>13</sup>C NMR (126 MHz, CDCl<sub>3</sub>)

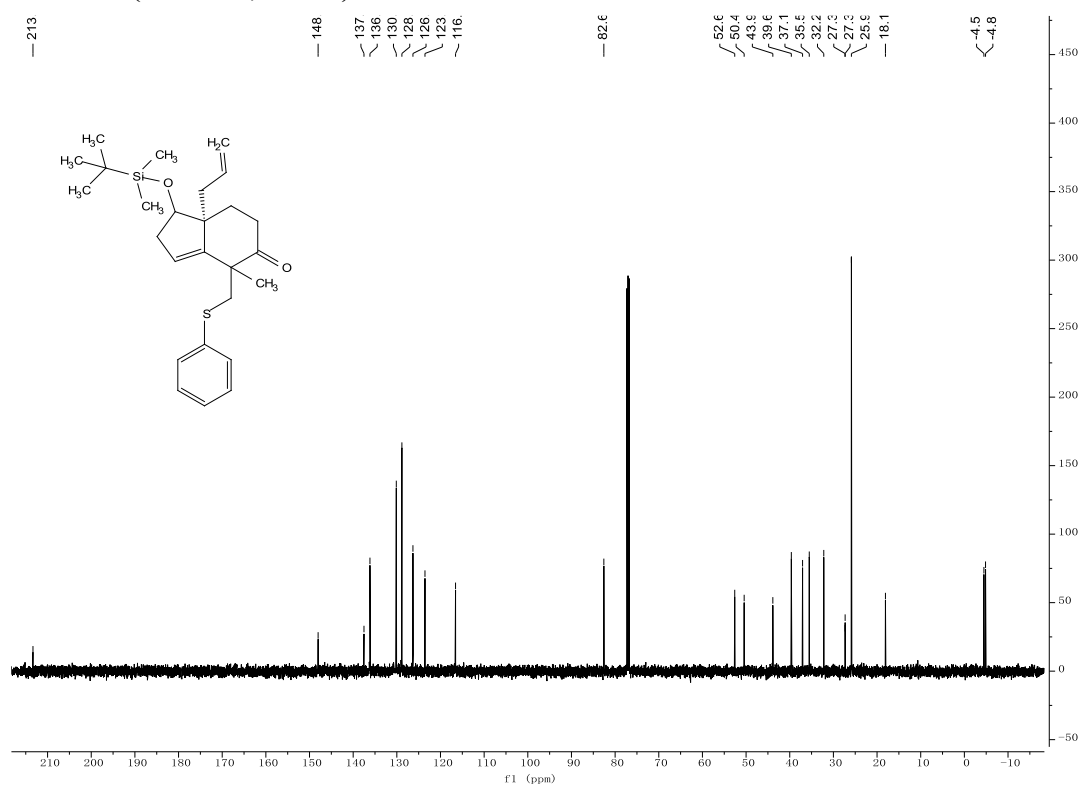

Compounds S2

<sup>1</sup>H NMR (500 MHz, CDCl<sub>3</sub>)

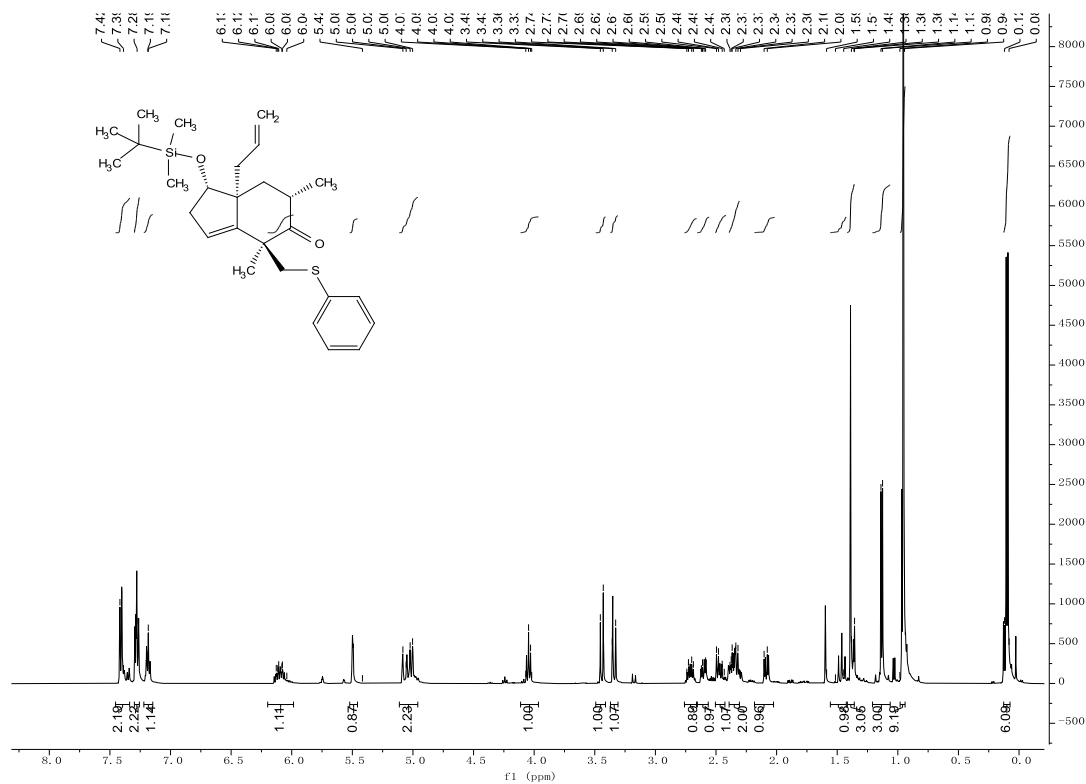

<sup>13</sup>C NMR (126 MHz, CDCl<sub>3</sub>)

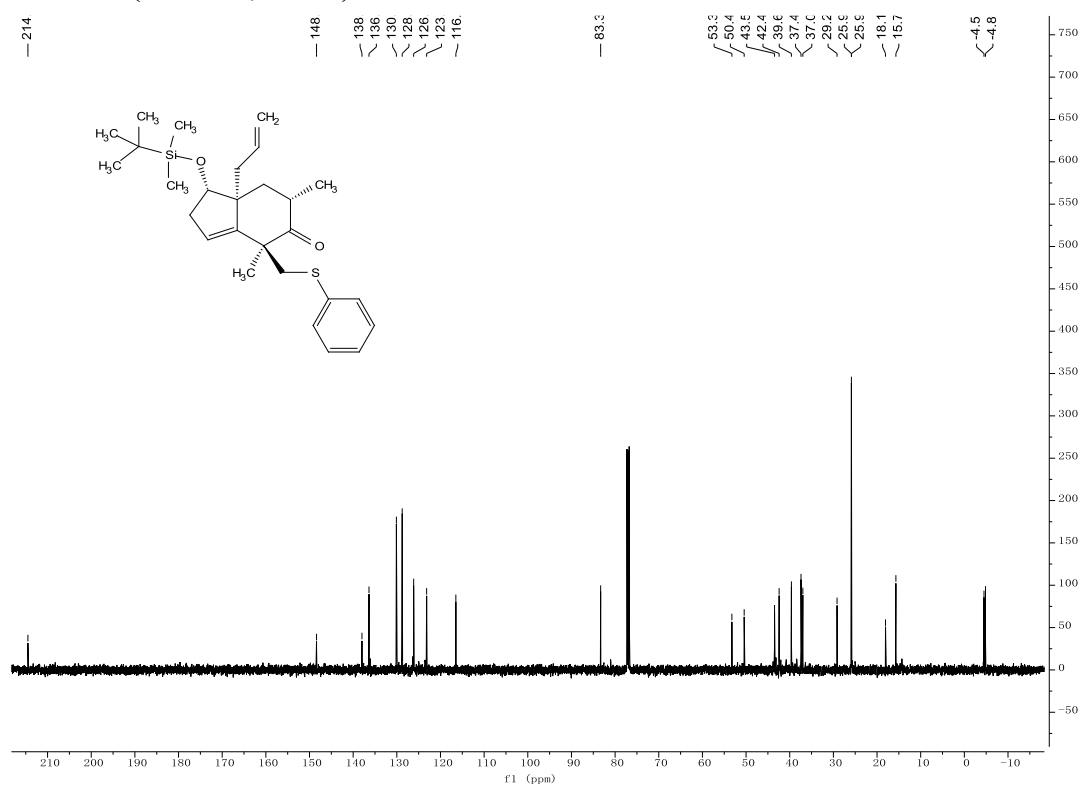

Compounds 8

<sup>1</sup>H NMR (500 MHz, CDCl<sub>3</sub>)

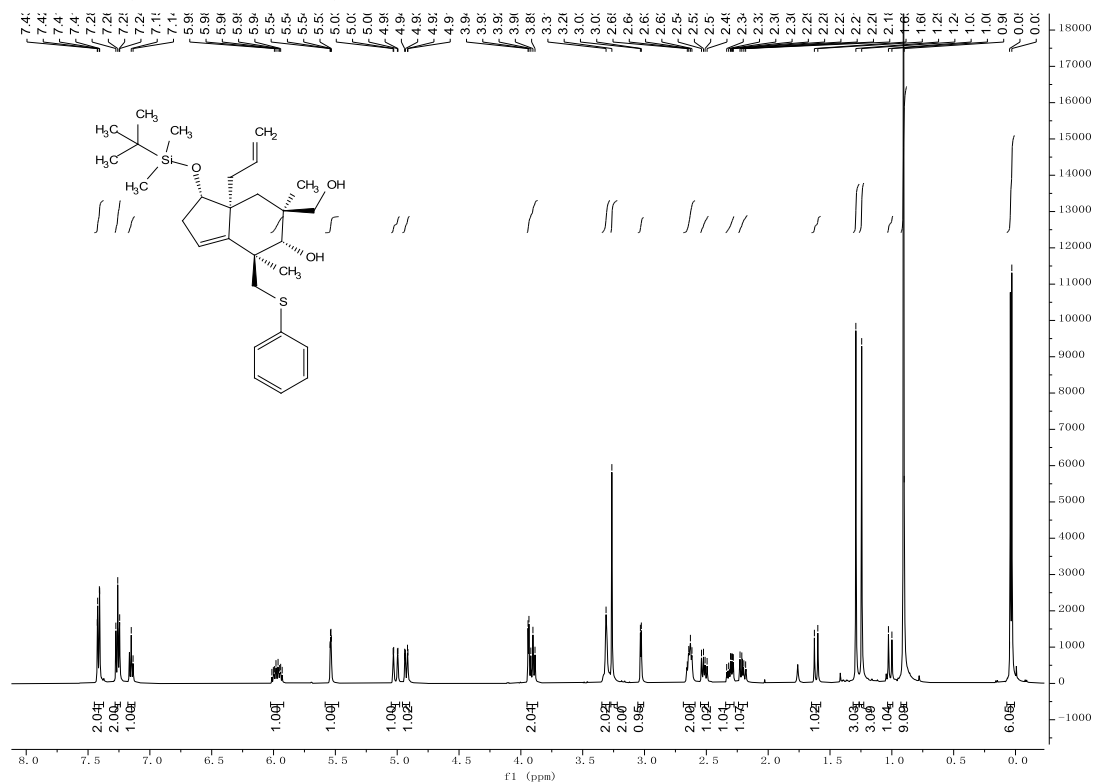

<sup>13</sup>C NMR (126 MHz, CDCl<sub>3</sub>)

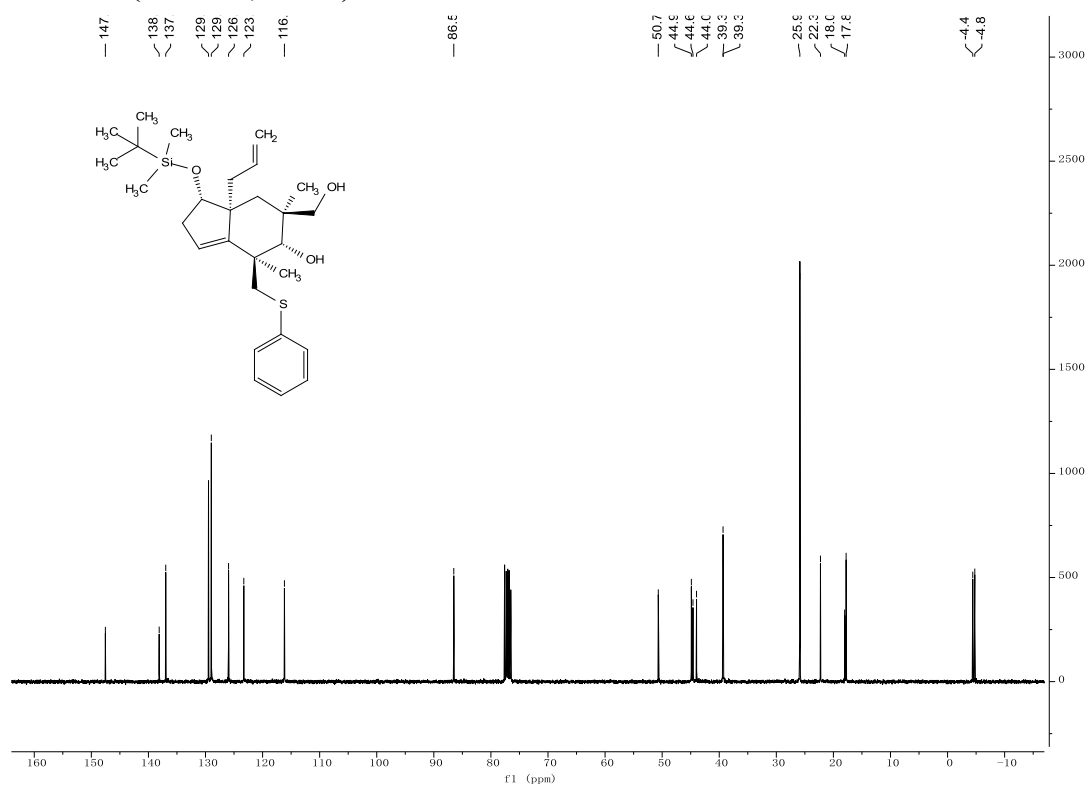

Compounds 4

<sup>1</sup>H NMR (500 MHz, CDCl<sub>3</sub>)

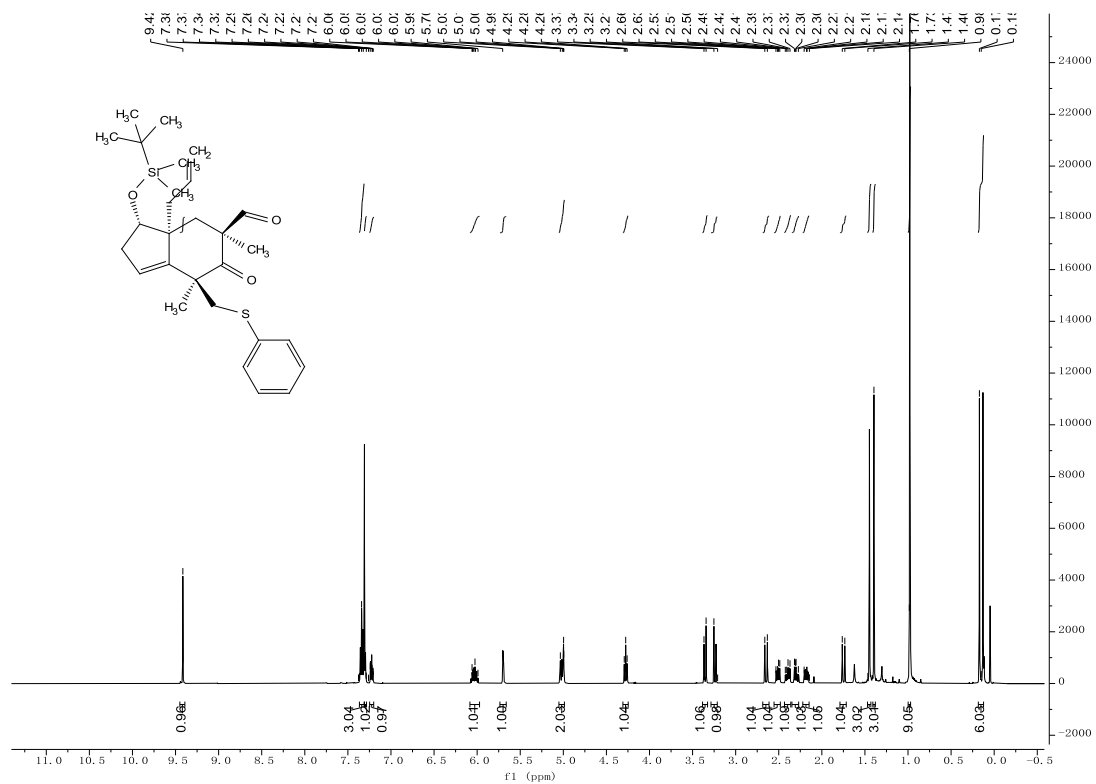

<sup>13</sup>C NMR (126 MHz, CDCl<sub>3</sub>)

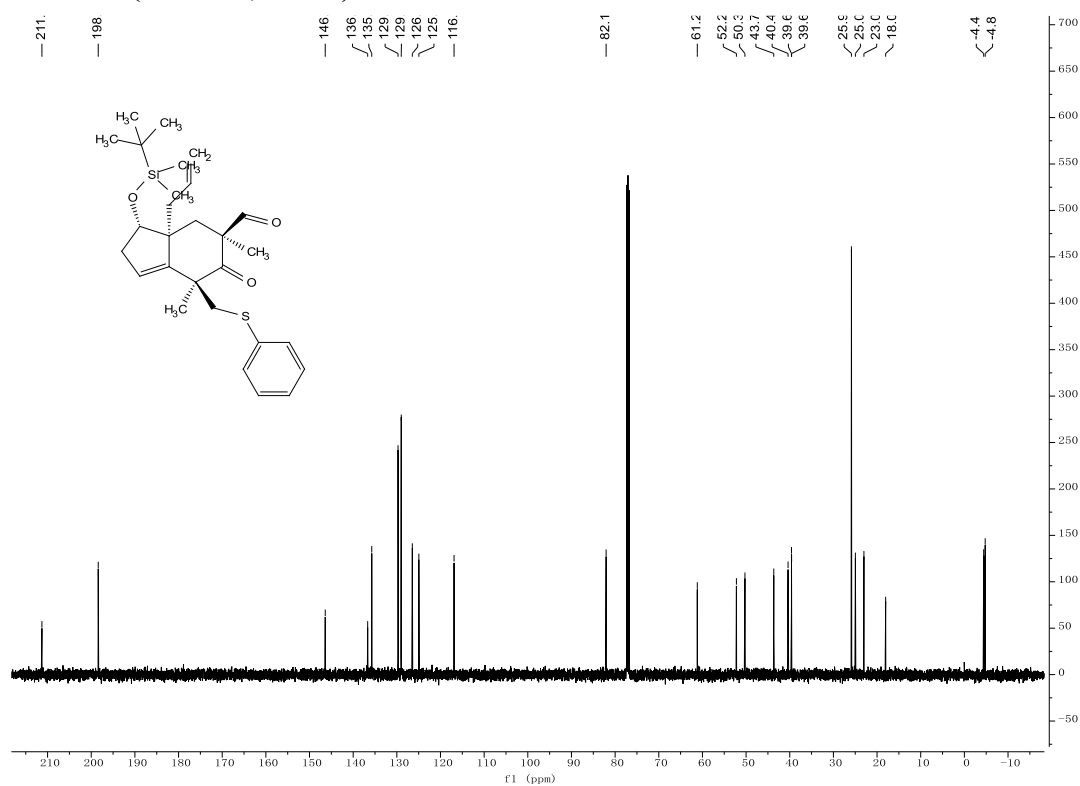

### Compounds 3

#### <sup>1</sup>H NMR (500 MHz, CDCl<sub>3</sub>)

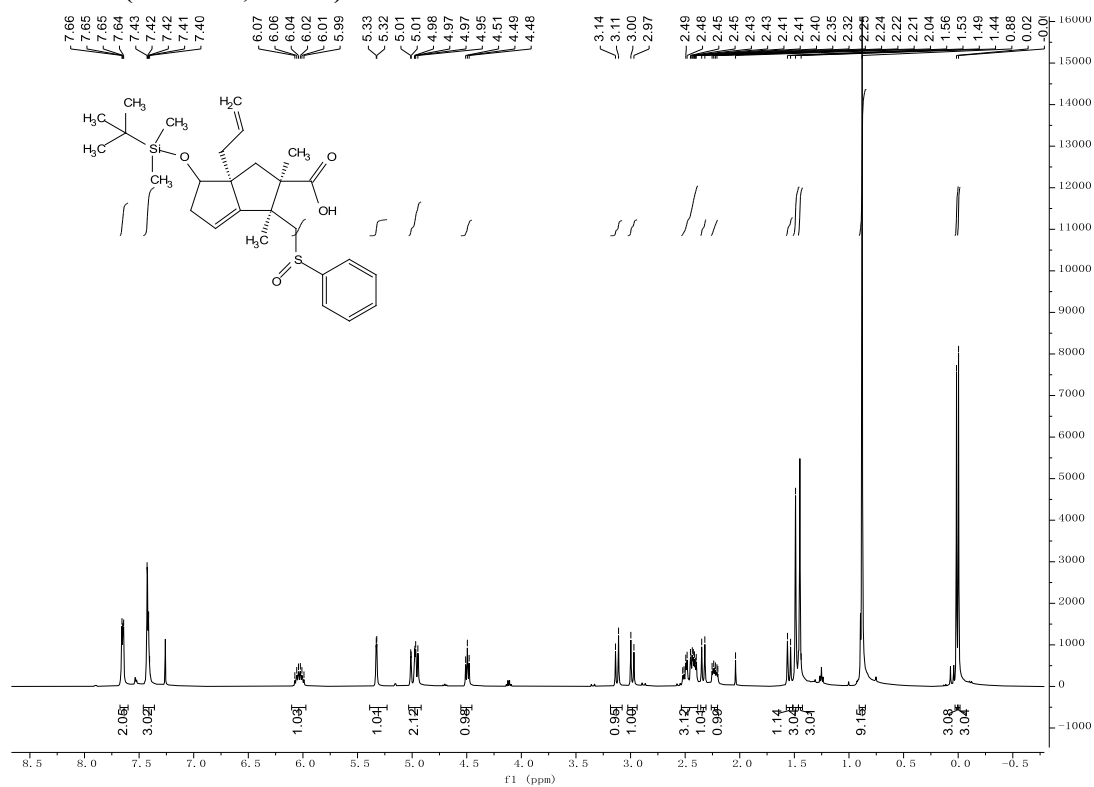

#### <sup>13</sup>C NMR (126 MHz, CDCl<sub>3</sub>)

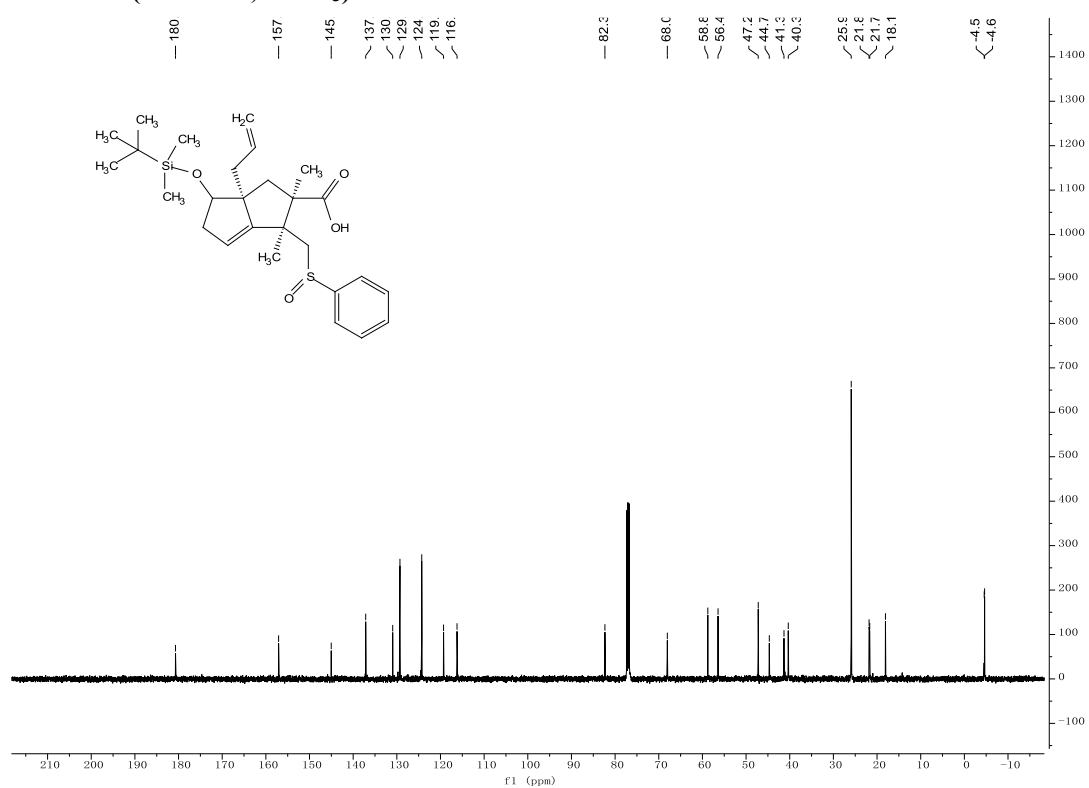



Compounds 9

<sup>1</sup>H NMR (500 MHz, CDCl<sub>3</sub>)

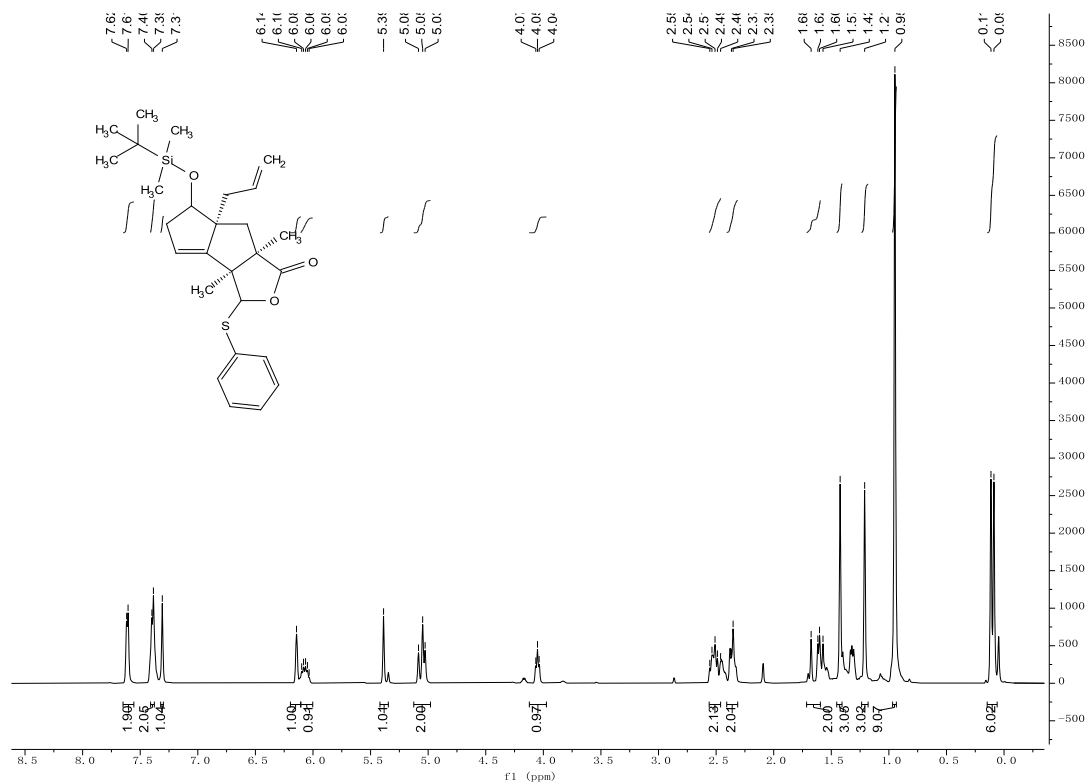

<sup>13</sup>C NMR (126 MHz, CDCl<sub>3</sub>)

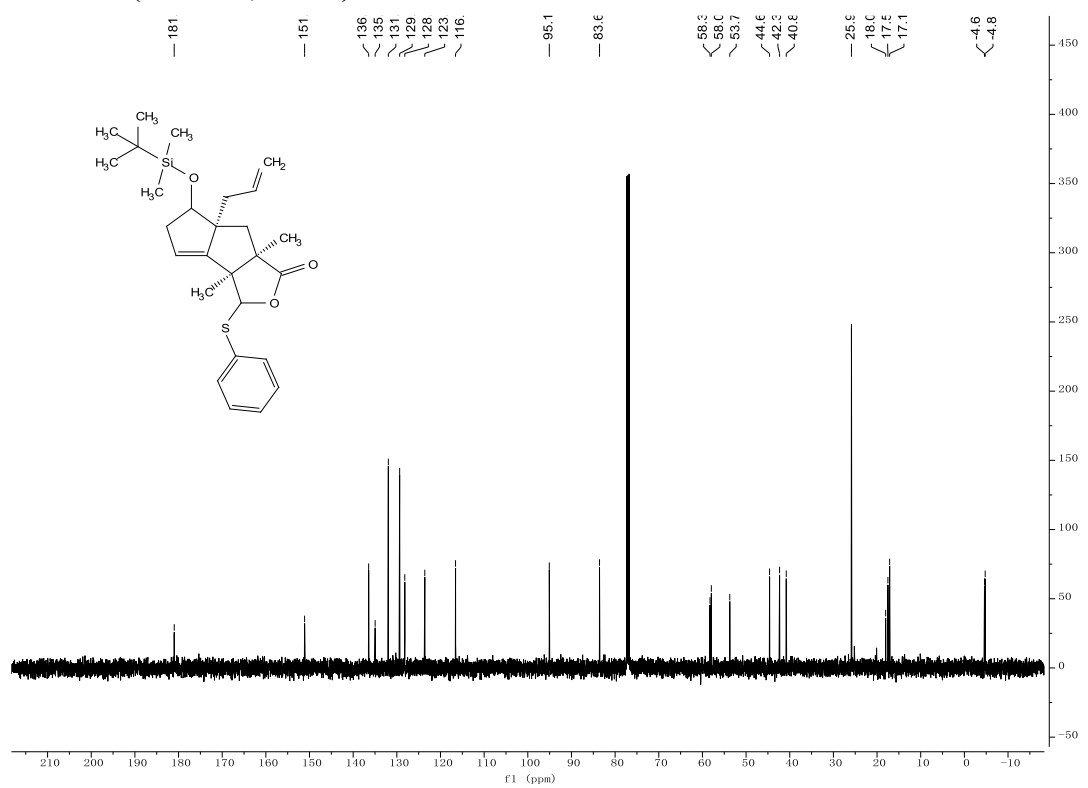

Compounds 10

<sup>1</sup>H NMR (500 MHz, CDCl<sub>3</sub>)

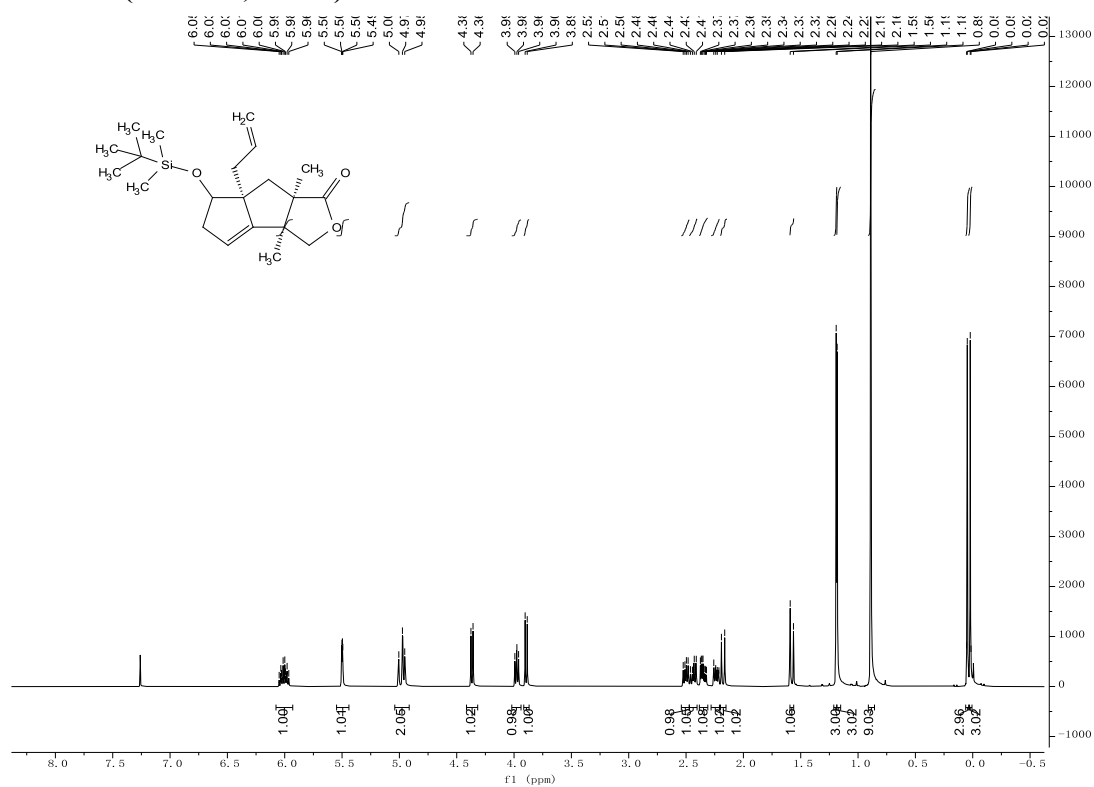

<sup>13</sup>C NMR (126 MHz, CDCl<sub>3</sub>)

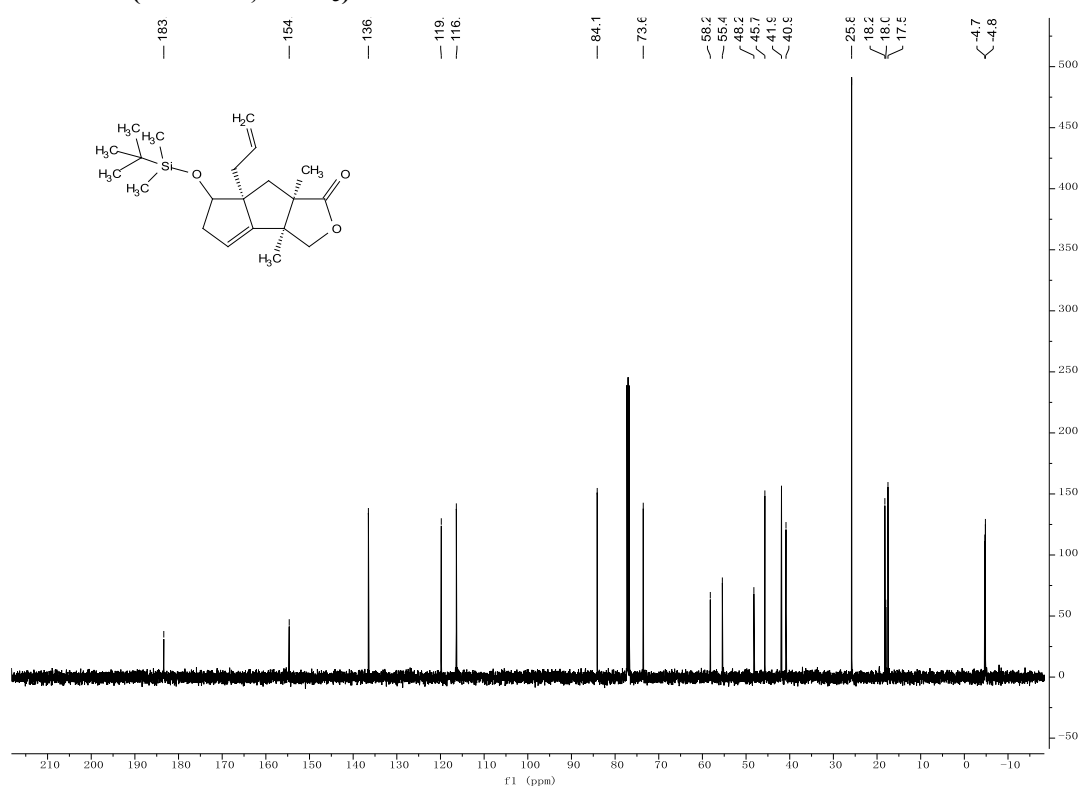

Compounds S3

<sup>1</sup>H NMR (500 MHz, CDCl<sub>3</sub>)

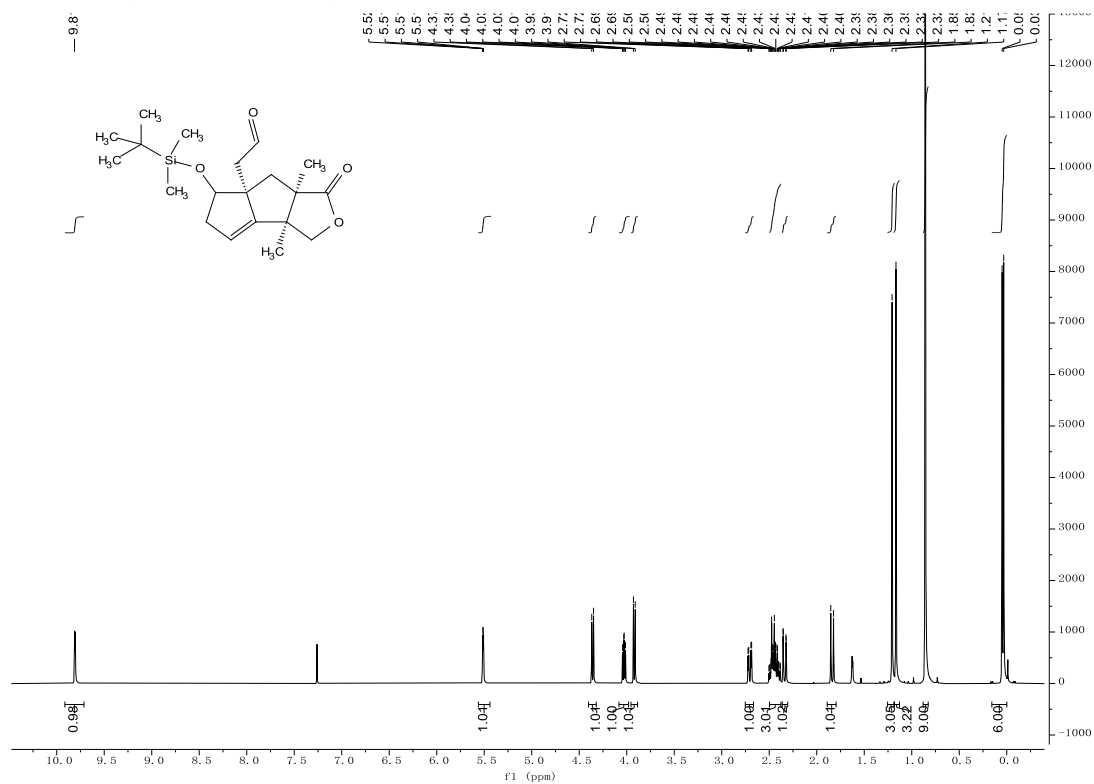

<sup>13</sup>C NMR (126 MHz, CDCl<sub>3</sub>)

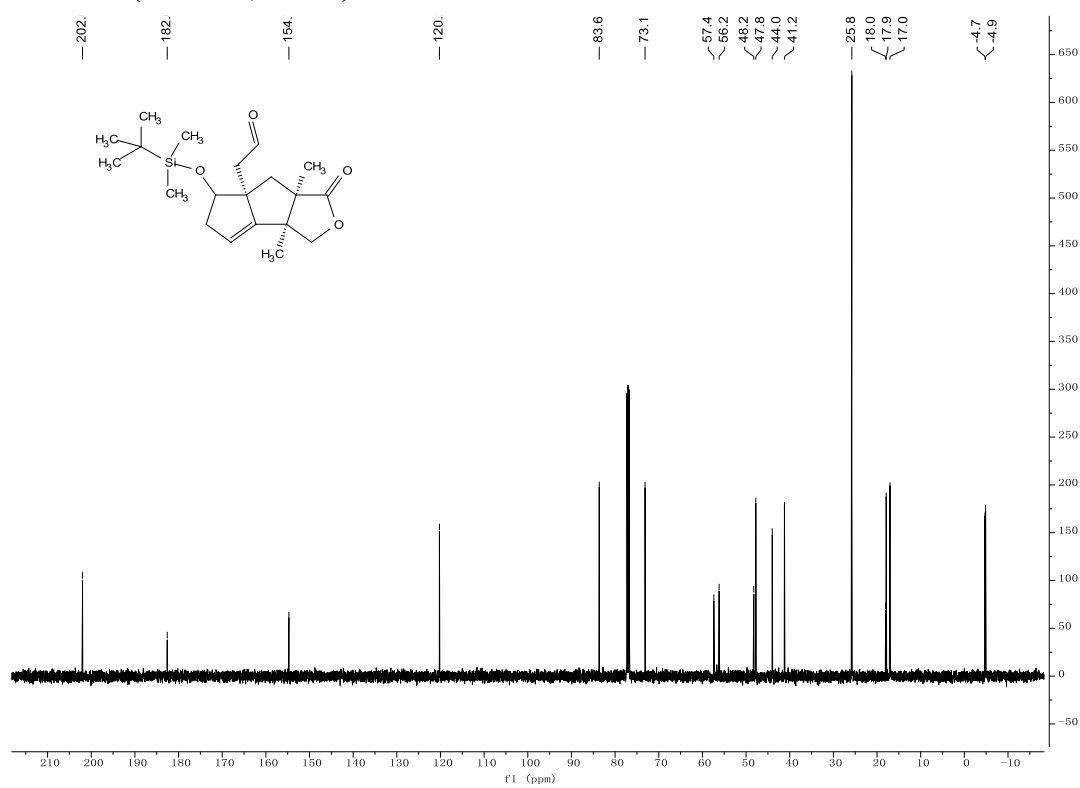

Compounds S4

<sup>1</sup>H NMR (500 MHz, CDCl<sub>3</sub>)

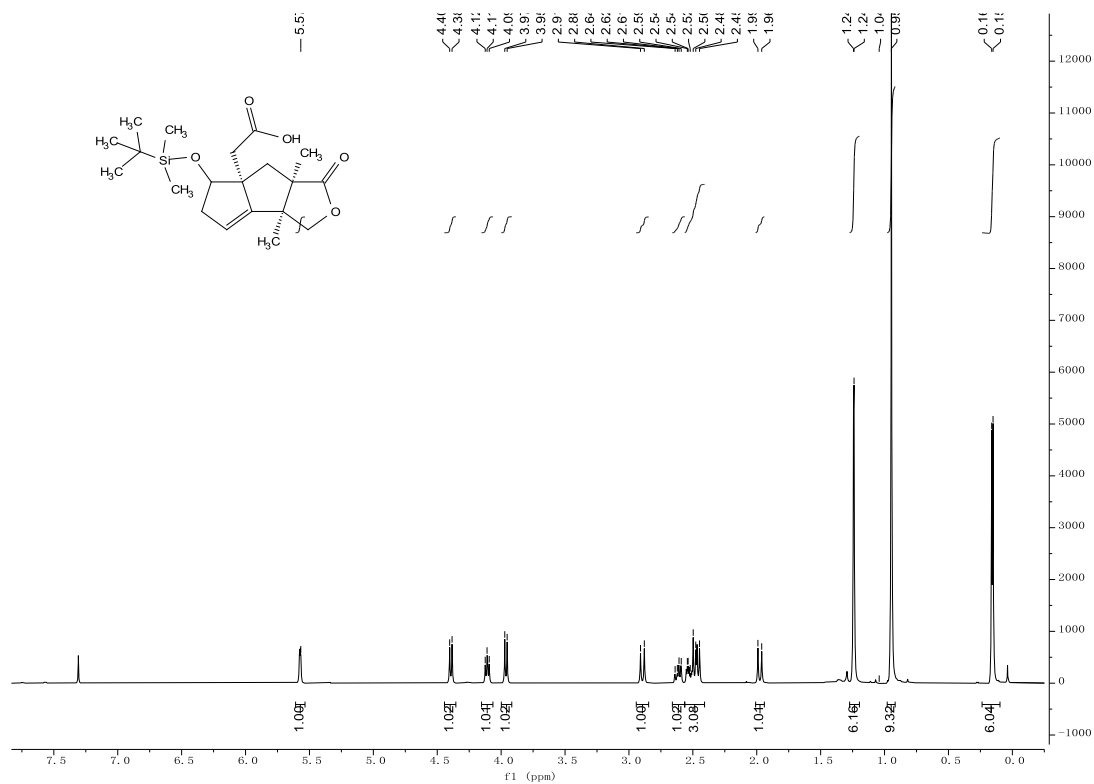

<sup>13</sup>C NMR (126 MHz, CDCl<sub>3</sub>)

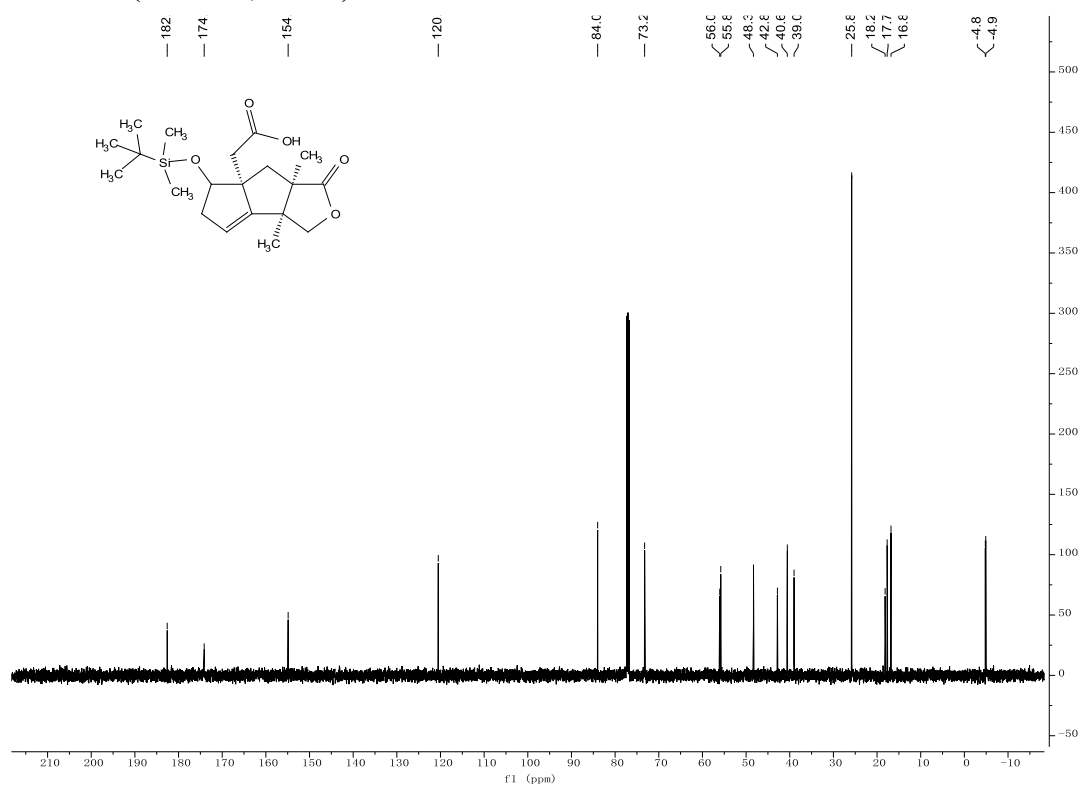

Compounds S5

<sup>1</sup>H NMR (500 MHz, CDCl<sub>3</sub>)

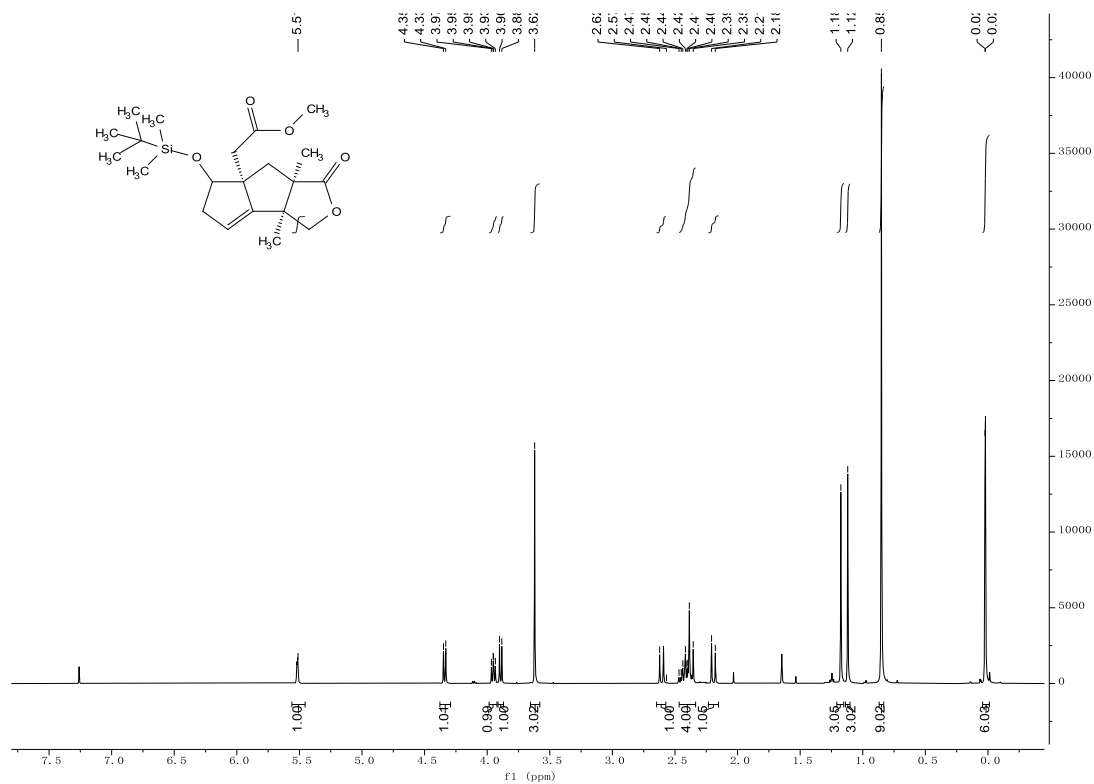

<sup>13</sup>C NMR (126 MHz, CDCl<sub>3</sub>)

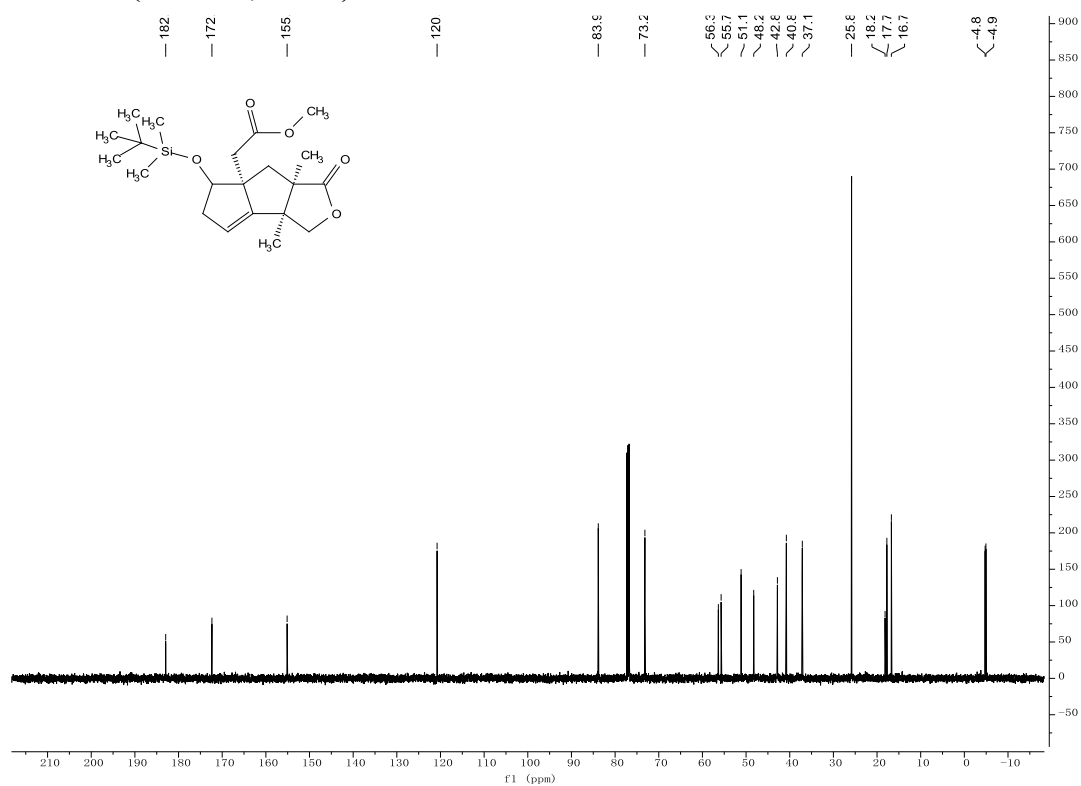

Compounds 11

<sup>1</sup>H NMR (500 MHz, CDCl<sub>3</sub>)

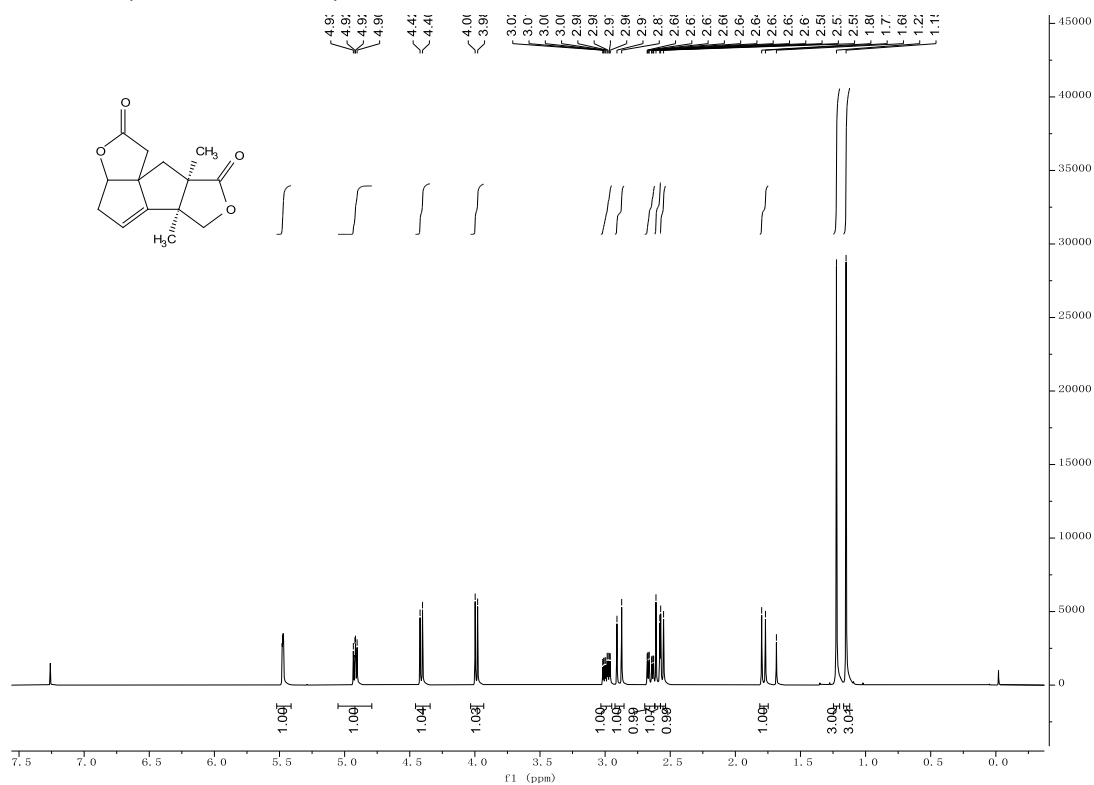

<sup>13</sup>C NMR (126 MHz, CDCl<sub>3</sub>)

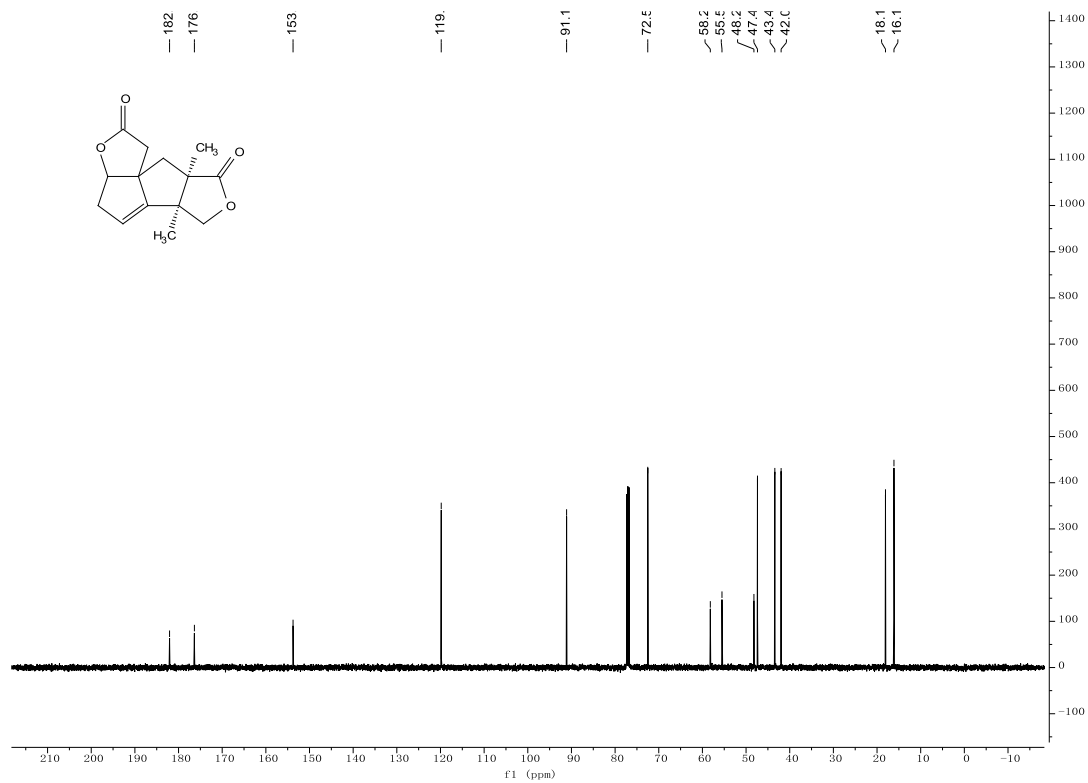

## Compounds 12

### <sup>1</sup>H NMR (500 MHz, Methanol-d<sub>4</sub>)

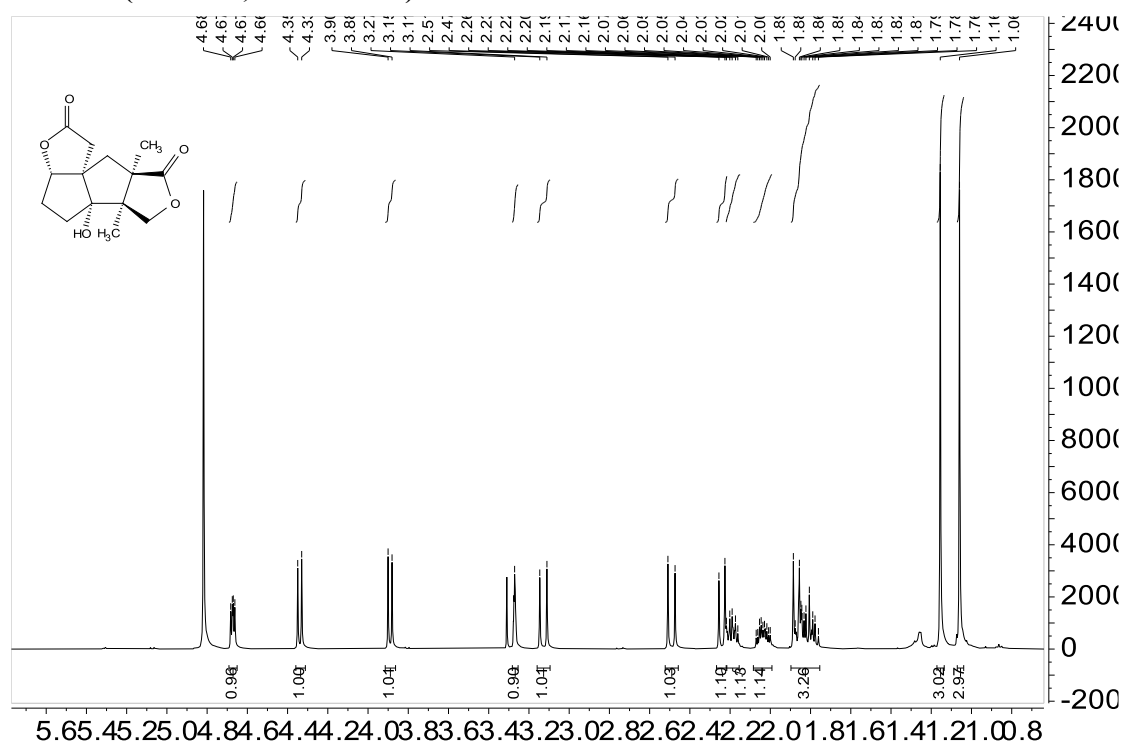

### <sup>13</sup>C NMR (126 MHz, Methanol-d<sub>4</sub>)

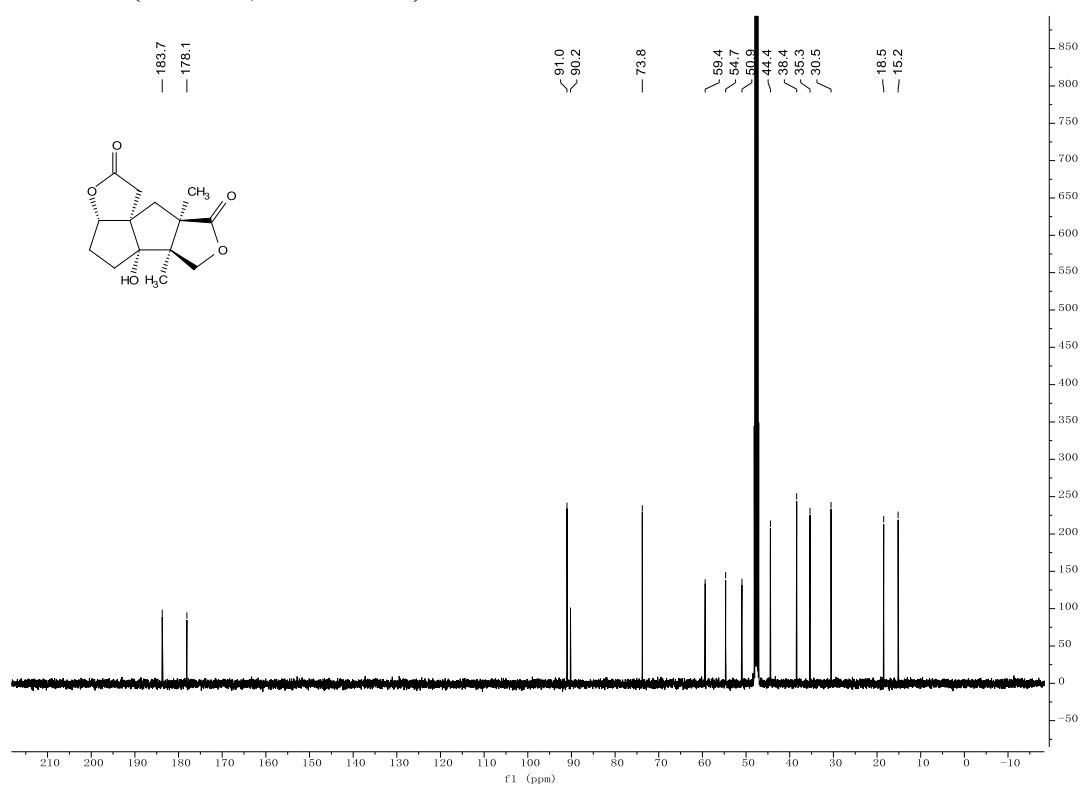

Compounds 13

<sup>1</sup>H NMR (500 MHz, CDCl<sub>3</sub>)

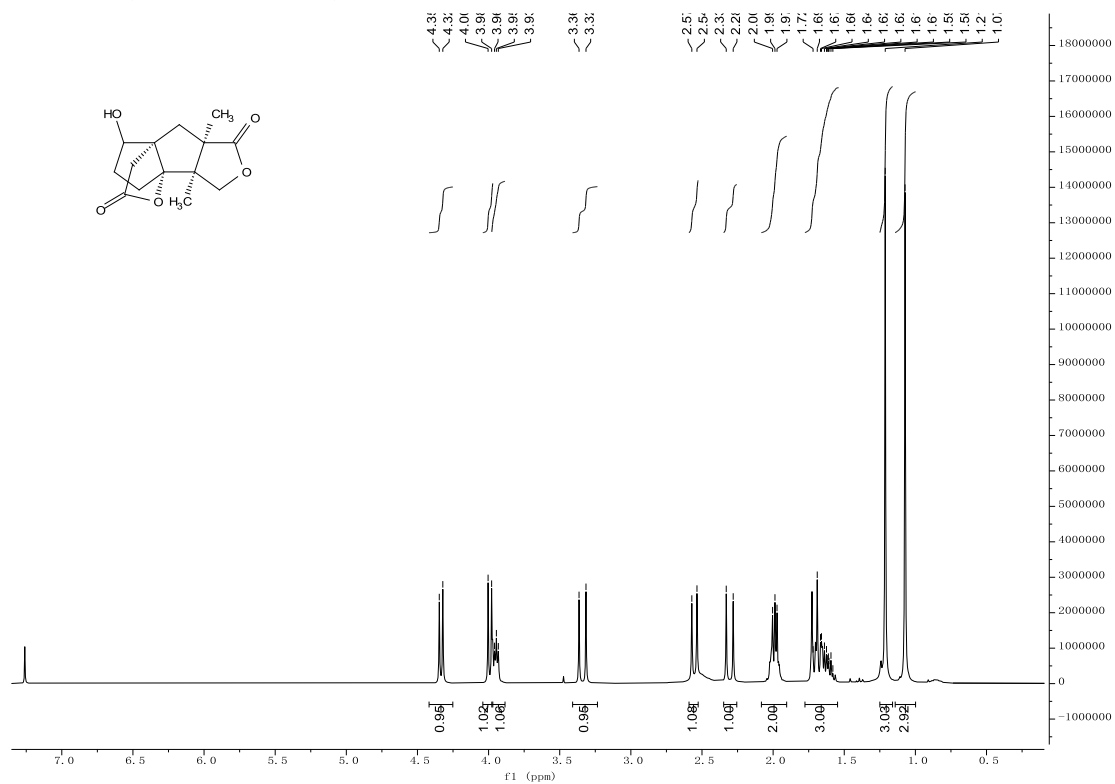

<sup>13</sup>C NMR (126 MHz, CDCl<sub>3</sub>)

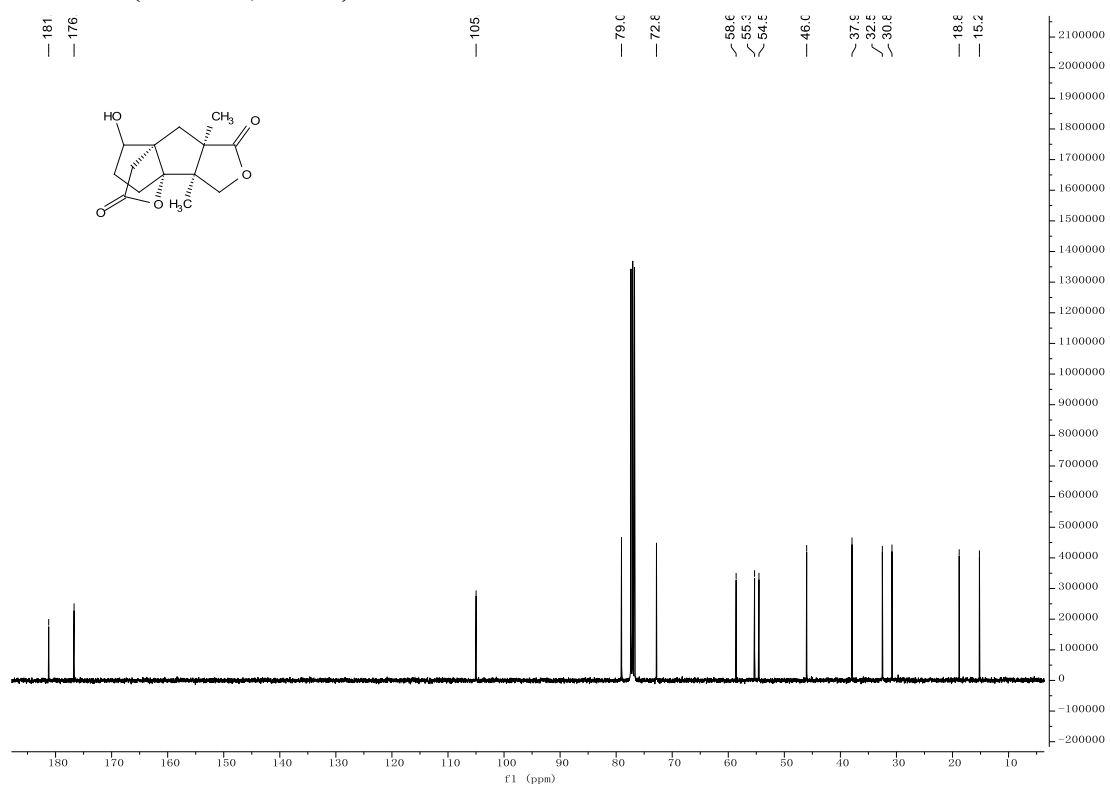



Compounds 14

$^1\text{H}$  NMR (500 MHz,  $\text{CDCl}_3$ )

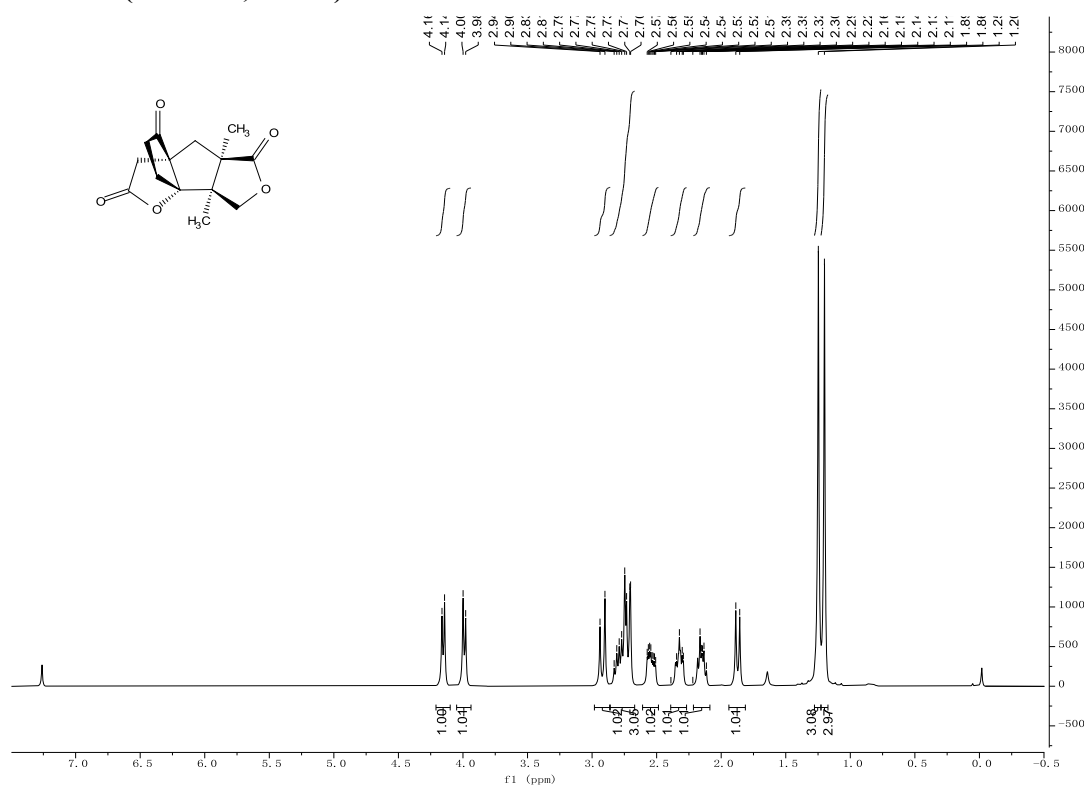

$^{13}\text{C}$  NMR (126 MHz,  $\text{CDCl}_3$ )

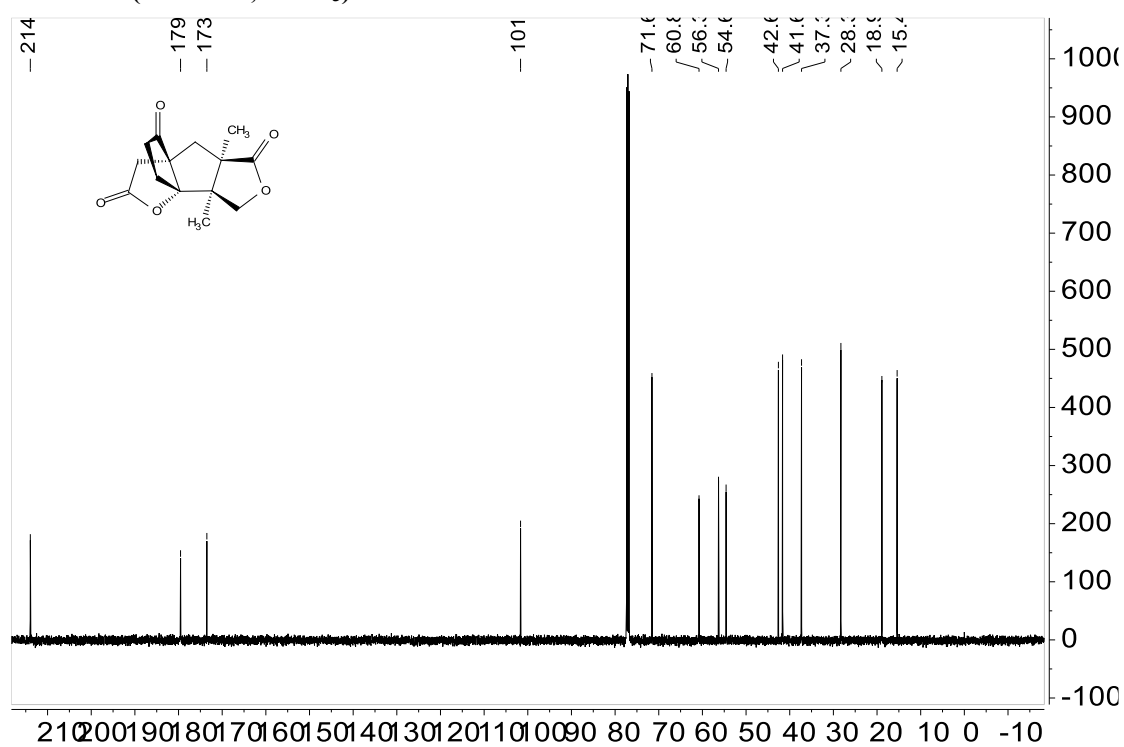

Compounds 16

<sup>1</sup>H NMR (500 MHz, CDCl<sub>3</sub>)

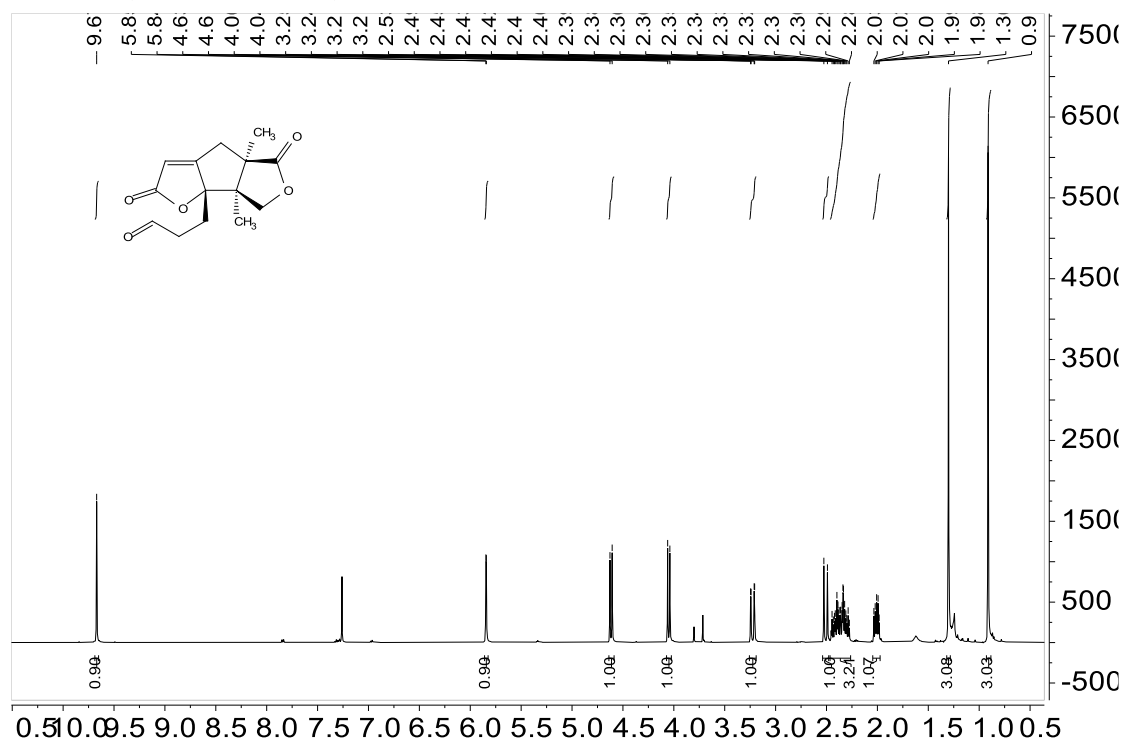

<sup>13</sup>C NMR (126 MHz, CDCl<sub>3</sub>)

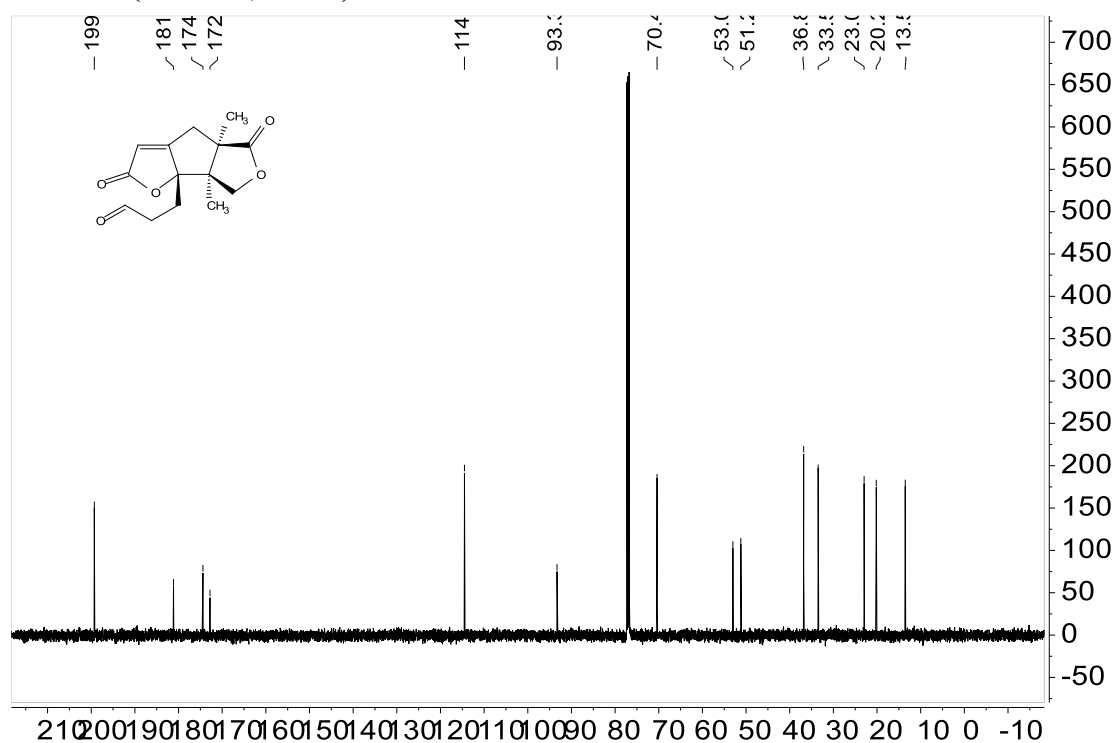

Compounds 17

<sup>1</sup>H NMR (500 MHz, CDCl<sub>3</sub>)

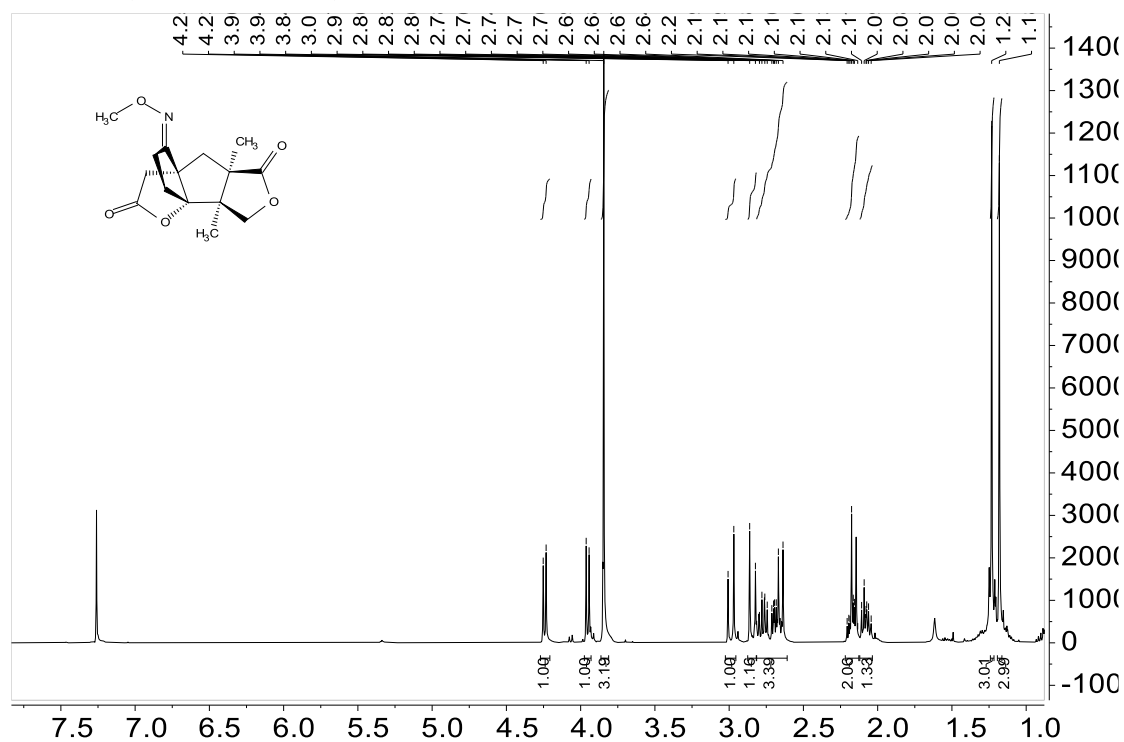

<sup>13</sup>C NMR (126 MHz, CDCl<sub>3</sub>)

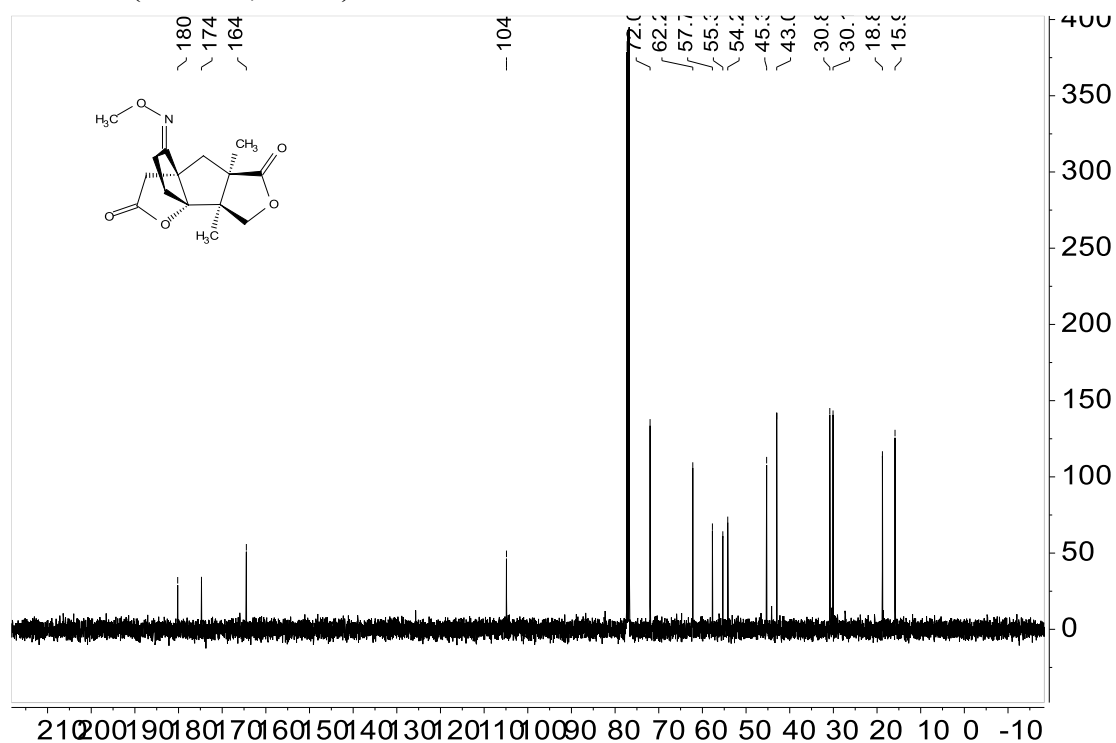

#### 4. X-ray Crystallographic Data.

Table S1: Data collection details for compound **8**

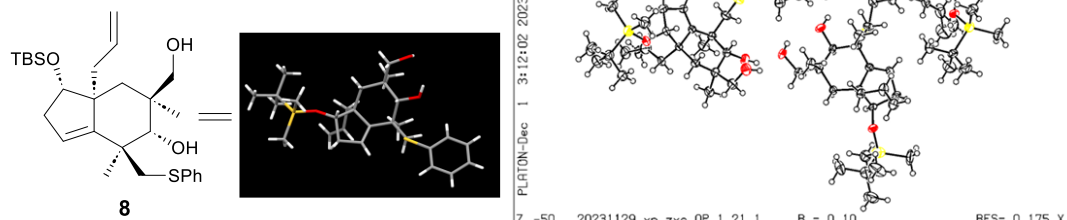

|                        |                                                                                                        |
|------------------------|--------------------------------------------------------------------------------------------------------|
| Bond precision         | C-C = 0.0126 Å                                                                                         |
| Wavelength             | 13.34139                                                                                               |
| Cell:                  | a = 10.2419 (8)<br>b = 40.802 (3)<br>c = 13.3467 (11)<br>alpha = 90<br>beta = 90.910 (4)<br>gamma = 90 |
| Volume                 | 5576.7 (8)                                                                                             |
| Space group            | P 1 21 1                                                                                               |
| Hall group             | P 2yb                                                                                                  |
| Sum formula            | C <sub>28</sub> H <sub>44</sub> O <sub>3</sub> S <sub>2</sub>                                          |
| Mr                     | 492.75                                                                                                 |
| Dx, g cm <sup>-3</sup> | 1.174                                                                                                  |
| Z                      | 8                                                                                                      |
| Mu (mm <sup>-1</sup> ) | 1.262                                                                                                  |
| F000                   | 2144.0                                                                                                 |
| h,k,lmax               | 12,50,16                                                                                               |
| Nref                   | 21637                                                                                                  |
| Reported T Limits:     | Tmin = 0.590 Tmax = 0.751                                                                              |
| Theta(max)             | 57.101                                                                                                 |
| R(reflections)         | 0.1021(18023)                                                                                          |
| wR2(reflections)       | 0.2861(21637)                                                                                          |
| S                      | 1.037                                                                                                  |
| Npar                   | 1278                                                                                                   |

The crystal of compound **8** was grown in the solution of CHCl<sub>3</sub> and MeOH as the solution slowly volatilized at room temperature.

**Table S2: Data collection details for compound 13**

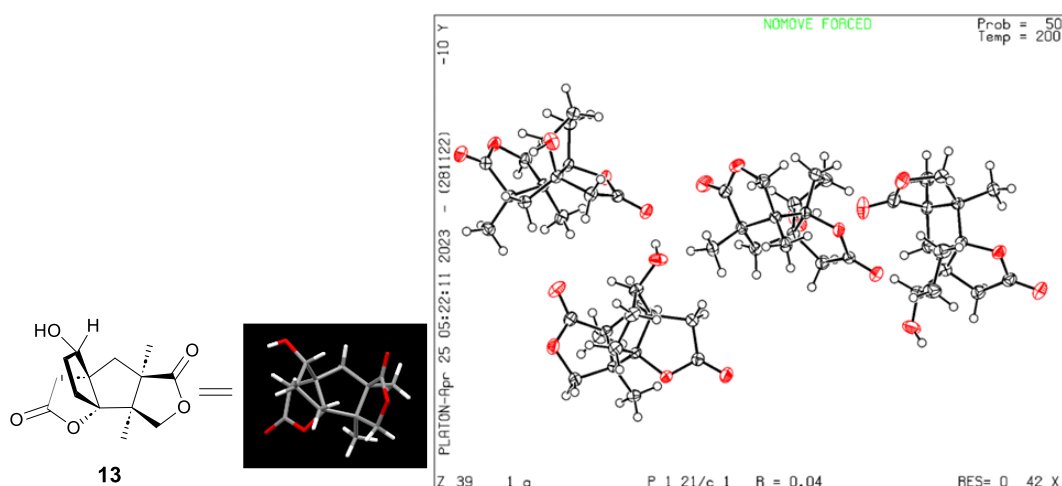

|                        |                                                |
|------------------------|------------------------------------------------|
| Bond precision         | C-C = 0.0019 Å                                 |
| Wavelength             | 1.34139                                        |
| Cell:                  | a=11.6821(8)                                   |
|                        | b=16.1543(12)                                  |
|                        | c=26.457(2)                                    |
|                        | alpha=90                                       |
|                        | beta=90.330                                    |
|                        | gamma=90                                       |
| Volume                 | 4962.3(6)                                      |
| Space group            | P 1 21/C 1                                     |
| Hall group             | -P 2ybc                                        |
| Sum formula            | C <sub>14</sub> H <sub>18</sub> O <sub>5</sub> |
| Mr                     | 266.28                                         |
| Dx, g cm <sup>-3</sup> | 1.426                                          |
| Z                      | 16                                             |
| Mu (mm <sup>-1</sup> ) | 0.573                                          |
| F000                   | 2272.0                                         |
| h,k,lmax               | 14,20,33                                       |
| Nref                   | 10166                                          |
| Reported T Limits:     | Tmin=0.625 Tmax=0.751                          |
| Data completeness      | 0.991                                          |
| Theta(max)             | 57.299                                         |
| R(reflections)         | 0.0376(7899)                                   |
| wR2(reflections)       | 0.1009(10166)                                  |
| S                      | 1.049                                          |
| Npar                   | 697                                            |

The crystal of compound **13** was grown in the solution of CHCl<sub>3</sub> and MeOH as the solution slowly volatilized at room temperature.

**Table S3: Data collection details for compound 16**

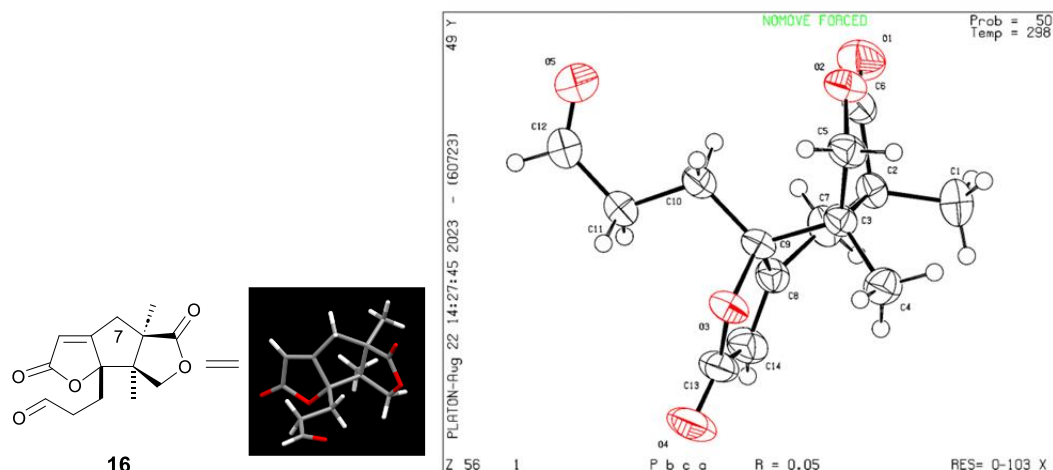

|                        |                       |
|------------------------|-----------------------|
| Bond precision         | C-C = 0.0030 Å        |
| Wavelength             | 1.34137               |
| Cell:                  | a=1.11397(7)          |
|                        | b=14.2090(9)          |
|                        | c=16.1659(11)         |
|                        | alpha=90              |
|                        | beta=90               |
|                        | gamma=90              |
| Volume                 | 2558.8(3)             |
| Space group            | P b c a               |
| Hall group             | -P 2ac 2ab            |
| Sum formula            | C14 H16 O5            |
| Mr                     | 264.27                |
| Dx, g cm <sup>-3</sup> | 1.372                 |
| Z                      | 8                     |
| Mu (mm <sup>-1</sup> ) | 0.555                 |
| F000                   | 1120.0                |
| h,k,lmax               | 13,17,20              |
| Nref                   | 2608                  |
| Reported T Limits:     | Tmin=0.414 Tmax=0.751 |
| Data completeness      | 0.996                 |
| Theta(max)             | 56.976                |
| R(reflections)         | 0.0494(1724)          |
| wR2(reflections)       | 0.1315(2608)          |
| S                      | 1.015                 |
| Npar                   | 174                   |

The crystal of compound **16** was grown in the solution of CHCl<sub>3</sub> and MeOH as the solution slowly volatilized at room temperature.
